1 **Title:** Brain perivascular space imaging across the human lifespan

2

3 **Authors:** Kirsten M. Lynch<sup>1\*</sup>, Farshid Seppehrband<sup>1</sup>, Arthur W. Toga<sup>1</sup>, Jeiran Choupan<sup>1</sup>

4

5 <sup>1</sup>Laboratory of Neuro Imaging (LONI), USC Mark and Mary Stevens Institute for Neuroimaging  
6 and Informatics, USC Keck School of Medicine, Los Angeles, CA, 90033

7

8 \*Corresponding author:

9 Email: [kirsten.lynch@loni.usc.edu](mailto:kirsten.lynch@loni.usc.edu)

1 **Abstract**

2 Enlarged perivascular spaces (PVS) are considered a biomarker for vascular pathology and are  
3 observed in normal aging and neurological conditions; however, research on the role of PVS in  
4 health and disease are hindered by the lack of knowledge regarding the normative time course of  
5 PVS alterations with age. To this end, we characterized the influence of age, sex and cognitive  
6 performance on PVS anatomical characteristics in a large cross-sectional cohort (~1400) of  
7 healthy subjects between 8 and 90 years of age using multimodal structural MRI data. Our results  
8 show age is associated with wider and more numerous MRI-visible PVS over the course of the  
9 lifetime with spatially-varying patterns of PVS enlargement trajectories. In particular, regions with  
10 low PVS volume fraction in childhood are associated with rapid age-related PVS enlargement  
11 (e.g., temporal regions), while regions with high PVS volume fraction in childhood are associated  
12 with minimal age-related PVS alterations (e.g., limbic regions). PVS burden was significantly  
13 elevated in males compared to females with differing morphological time courses with age.  
14 Together, these findings contribute to our understanding of perivascular physiology across the  
15 healthy lifespan and provide a normative reference for the spatial distribution of PVS enlargement  
16 patterns to which pathological alterations can be compared.

17

18 **Keywords:** Perivascular spaces, waste clearance, lifespan, aging, morphology, neuroimaging,  
19 cerebrovascular

## 1 **Introduction**

2           The brain waste clearance system consists of a network of vasculature that plays a critical  
3 role in the removal of toxic substrates from the brain to maintain tissue homeostasis. A major  
4 component of the waste clearance system includes perivascular spaces (PVS), which consist of  
5 tubular, interstitial fluid-filled cavities that surround small penetrating vessels in the brain  
6 parenchyma (Wardlaw et al., 2020). PVS provide a low-resistance pathway to facilitate fluid  
7 exchange (Bedussi et al., 2018), where they accommodate the influx of cerebrospinal fluid (CSF)  
8 and energy substrates in the peri-arterial space and the drainage of interstitial fluid and metabolic  
9 waste through the peri-venous space (Bacyinski et al., 2017; Iliff et al., 2013, 2012). It was recently  
10 demonstrated in animal models that pathological PVS enlargement is associated with reduced  
11 waste clearance functionality (Xue et al., 2020) and can thus impede the removal of toxic  
12 metabolites, including amyloid beta ( $A\beta$ ), and render the brain susceptible to neurological damage  
13 (Keable et al., 2016). Because several neurological conditions are characterized by dysfunctional  
14 waste clearance (Sweeney et al., 2018; Troili et al., 2020; Wardlaw et al., 2020), an understanding  
15 of the factors that contribute to PVS alterations can provide insight into disease pathogenesis.

16           Over the past decade, technological advancements in MRI acquisition and data  
17 processing have facilitated the study of PVS characteristics in health and neurological disease.  
18 Recent evidence from MRI studies in humans have shown significantly increased PVS visibility in  
19 the brains of patients with neurological conditions, including cerebrovascular disease (Charidimou  
20 et al., 2017, 2013; Doubal et al., 2010; Martinez-Ramirez et al., 2013; Potter et al., 2015),  
21 traumatic brain injury (Opel et al., 2018), stroke (Charidimou et al., 2013), Alzheimer's Disease  
22 (AD) (Banerjee et al., 2017b), mild cognitive impairment (Sepehrband et al., 2021) and  
23 Parkinson's disease (Donahue et al., 2021). While typically considered a biomarker of vascular  
24 neuropathology (Doubal et al., 2010; Mestre et al., 2017; Potter et al., 2015), enlarged PVS are  
25 also observed in healthy, cognitively normal individuals. Increased PVS visibility is a prominent  
26 feature of advancing age (A Laveskog et al., 2018; Zhu et al., 2011) and recent evidence has

1 shown that enlarged PVS are also observed in typically developing adolescents (Piantino et al.,  
2 2020) and young adults (Barisano et al., 2020), albeit at much lower levels. However, the precise  
3 trajectory of PVS alterations as a consequence of age across the normative lifespan has yet to  
4 be fully described. Because the highest risk factor for the development of neurodegenerative  
5 disease is advancing age (Hou et al., 2019), age-related alterations to the components that  
6 facilitate the elimination of waste may render the brain more vulnerable to neurodegenerative  
7 pathology. Therefore, characterization of the time course of PVS alterations in the normal human  
8 brain can provide insight into the evolution of waste clearance mechanisms and can offer a  
9 benchmark from which pathological PVS enlargement can be differentiated from that attributed to  
10 normal, healthy aging.

11 PVS have been observed in several regions of the brain, including the centrum semiovale  
12 of the white matter, basal ganglia (BG), hippocampus and midbrain structures (Potter et al., 2015).  
13 In particular, PVS enlargement within the white matter and BG are differentially associated with  
14 neuropathology. Vasculopathies, such as cerebral small vessel disease (CSVD) and  
15 hypertension, are preferentially associated with increased PVS visibility in the BG (Charidimou et  
16 al., 2017, 2013; Doubal et al., 2010; Martinez-Ramirez et al., 2013; Potter et al., 2015), while  
17 white matter PVS alterations are predominantly observed in patients with amyloidopathies  
18 (Banerjee et al., 2017a; Charidimou et al., 2015; Martinez-Ramirez et al., 2013; Ramirez et al.,  
19 2015), such as AD and cerebral amyloid angiopathy (CAA). The apparent spatial dependence of  
20 neuropathological PVS enlargement suggest the mechanisms that contribute to increased PVS  
21 visibility differ between the white matter and BG. The heterogeneous characteristics of MRI-visible  
22 PVS therefore suggest that the mechanisms that govern PVS dilations in health and disease may  
23 differ according to spatial location. A comprehensive understanding of regional patterns of PVS  
24 enlargement across the lifespan in the BG and subcortical white matter would provide granular  
25 insight into brain regions that may be particularly susceptible to age-related changes in waste  
26 clearance processes.

1            Much of the evidence of age-related changes to PVS burden come from studies that  
2 employ a visual rating scale to score the severity of PVS burden on select axial slices (Francis et  
3 al., 2019; Gutierrez et al., 2013; A. Laveskog et al., 2018; Yakushiji et al., 2014; Zhu et al., 2011,  
4 2010). While this approach can be easily implemented in clinical settings, it does not objectively  
5 quantify PVS content and may fail to capture regional PVS heterogeneity across the brain.  
6 Recently, efforts that utilize automated methods have enabled quantification of global PVS  
7 features; however, studies of normative aging have largely focused on PVS total volume or the  
8 fraction of tissue volume occupied by PVS (volume fraction, VF) (Barisano et al., 2020; Huang et  
9 al., 2021). These approaches provide limited information regarding the anatomical characteristics  
10 of PVS and can be confounded by total brain volume and age-related atrophy, as previous studies  
11 have shown PVS volume is significantly correlated with intracranial volume (ICV) (Barisano et al.,  
12 2020; Huang et al., 2021). Therefore, utilization of multiple morphological and structural  
13 characteristics, such as cross-sectional diameter, solidity and count, can provide greater insight  
14 into the mechanisms that contribute to age-related alterations in PVS volume.

15            The goal of this study is to characterize the influence of age on regional PVS burden in  
16 the white matter and BG across the lifespan in a large cross-sectional cohort (~1400) of typically  
17 developing and cognitively normal children, adults and the elderly between 8 and 90 years of age.  
18 Here, we visualize PVS using an automated processing workflow to identify and quantify PVS  
19 morphometric features from vesselness maps derived from multi-modal structural neuroimaging  
20 contrasts designed to enhance PVS visibility (Seppehrband et al., 2019). Features of PVS  
21 morphology, including PVS VF, count, mean cross-sectional diameter and mean solidity, were  
22 extracted and used to quantify the magnitude and timing of PVS alterations across the lifespan in  
23 the BG and white matter regions using growth models. Additionally, we explored the influence of  
24 sex, excess body mass and blood pressure on age-related alterations to PVS morphology. The  
25 results from this study will provide a normative reference for the spatial distribution and time

1 course of PVS alterations across the lifespan, to which pathological deviations from the expected  
2 trajectory can be compared.

3

#### 4 **Results**

5 Age distributions for the HCP cohorts stratified by sex are provided in **Table 1**. Overall,  
6 age was not significant different between sexes ( $t(1387)=.79$ ,  $p=.43$ ); however females were  
7 significantly older than males in the HCP-YA cohort ( $t(403)=-4.07$ ,  $p<.001$ ). PVS were present  
8 throughout the white matter and BG in all 3 cohorts and showed increasing presence with age  
9 (**Fig. 1**).

10

#### 11 *Age-related PVS alterations in the basal ganglia*

12 Cohort-stratified multiple regression analyses show PVS morphological features are  
13 significantly associated with age after controlling for covariates in the HCP-A group only (**Table**  
14 **2**). Age is positively associated with PVS volume fraction (VF) ( $p<.0001$ ), PVS count ( $p<.0001$ ),  
15 and mean PVS cross-sectional diameter ( $p<.0001$ ) and negatively associated with mean PVS  
16 solidity ( $p<.0001$ ) in the HCP-A cohort (**SI Appendix, Fig. S1**). In the combined lifespan analyses,  
17 a quadratic regression best explained the age-related variance in PVS morphology (**Table 3**). The  
18 relationship between age and PVS VF, mean PVS diameter and PVS count were described with  
19 a convex curve (**Fig. 2A-C**) and the relationship between age and mean PVS solidity were  
20 described with a concave curve (**Fig. 2D**). The minimum PVS volume fraction and PVS count are  
21 estimated at  $14\pm 3$  years and  $43\pm 2$  years of age, respectively, and increase thereafter, while the  
22 maximum PVS mean solidity is estimated at age  $10\pm 9$  years and decreases nonlinearly. Across  
23 all features, the most rapid feature differences with age occur in the aging cohort (**Fig. 2E**).

24

#### 25 *Age-related PVS alterations in the total subcortical white matter*

1 Cohort-stratified multiple regression analyses of PVS morphology in white matter show  
2 significant associations with age in multiple HCP cohorts (**Table 2**). PVS VF was significantly and  
3 positively associated with age in HCP-D ( $p<.0001$ ), HCP-YA ( $p=.0002$ ) and HCP-A ( $p<.0001$ ).  
4 Age was significantly associated with increasing PVS count in HCP-D ( $p<.0001$ ), but not HCP-A  
5 ( $p=.40$ ). The relationship between age and PVS count in the HCP-YA ( $p=.0047$ ) was reduced to  
6 non-significance following multiple comparison correction with a Bonferroni corrected threshold  
7 of  $p<.0042$ . Age was significantly associated with increased mean PVS diameter in HCP-A  
8 ( $p<.0001$ ), but not HCP-D ( $p=.87$ ) or HCP-YA following multiple comparison correction ( $p=.0053$ ).  
9 Mean PVS solidity was significantly and negatively associated with age in HCP-A ( $p<.0001$ ) and  
10 HCP-YA ( $p=.0014$ ), but not HCP-D ( $p=.26$ ). When combined across cohorts (**Table 3**), a linear  
11 regression account for the most age-related variance in PVS VF (**Fig. 3A**) and mean PVS  
12 diameter (**Fig. 3C**). The relationship between age and PVS count were best described by a  
13 concave quadratic model with the most rapid changes observed early in life and peaking at  $61\pm 2$   
14 years of age (**Fig. 3B**). Age-related reductions to PVS mean solidity were best described by a  
15 convex quadratic model that reaches stasis later in life with the estimated minimum solidity  
16 beyond the age range sampled ( $90\pm 25$  years) (**Fig. 3D**). Standardization of PVS features show  
17 all morphological characteristics contribute to the age-related increase in PVS VF with varying  
18 degrees (**Fig. 3E**).

19

#### 20 *Age-related PVS alterations within regions of the subcortical white matter*

21 The distribution of PVS burden across regions per HCP cohort is shown in **Fig. 4**. Within  
22 HCP-D, temporal white matter has the lowest PVS VF ( $M\pm SD = .0048\pm .0027$ ), particularly within  
23 parahippocampal and entorhinal regions, followed by occipital ( $.0051\pm .0022$ ), parietal  
24 ( $.0077\pm .0035$ ) and frontal ( $.0071\pm .0044$ ) structures. The limbic white matter has the highest PVS  
25 VF in HCP-D ( $.0143\pm .0047$ ), specifically within bilateral isthmus and rostral anterior cingulate  
26 regions. Within HCP-YA, occipital white matter has the lowest PVS VF ( $.0062\pm .0028$ ), following

1 by temporal (.0076±.0034), parietal (.0100±.0042), frontal (.0119±.0047) and limbic (.0164±.0046)  
2 structures. This trend was also observed in the HCP-A cohort (occipital: .0099±.0039; temporal:  
3 .0132±.0045; parietal: .0159±.0051; frontal: .0186±.0052; limbic: .0217±.0053), with the lowest  
4 PVS VF in bilateral cuneus, parahippocampal and entorhinal regions and highest PVS VF in  
5 bilateral insula, rostral anterior cingulate and lateral orbitofrontal regions.

6 Exponential growth curves were used to quantify regional patterns of age-related PVS VF  
7 trajectories (**Fig. 5**). We found regions with the highest PVS VF in childhood are characterized by  
8 the slowest growth rate, including the white matter underlying the caudal anterior, isthmus and  
9 rostral anterior cingulate cortices bilaterally (**Fig. 5A-B**). Conversely, regions with low PVS VF in  
10 childhood, including white matter adjacent to bilateral cuneus, lateral and transverse occipital,  
11 inferior frontal and transverse temporal cortices had the largest growth rates. Indeed, we found  
12 the estimated PVS VF at age 8 years of age was significantly associated with slower growth rates  
13 across the lifespan (**Fig. 5C**;  $B=-.71$ ,  $t(66)=-12.15$ ,  $p<.001$ ,  $R^2=.69$ ), where limbic regions tend to  
14 have high PVS VF in childhood that changes minimally with age and temporal regions have low  
15 PVS VF in childhood that show the largest percent difference across the lifespan (**Fig. 6**). Occipital  
16 regions deviate from this trend, where PVS VF remains low throughout the lifespan. These trends  
17 were observed bilaterally and the growth rate of left hemisphere white matter regions were  
18 significantly and positively correlated with the right hemisphere (**Fig. 5D**;  $B=.98$ ,  $t(32)=16.43$ ,  
19  $p<.001$ ,  $R^2=.89$ ).

20

### 21 *PVS sex differences*

22 In the combined lifespan dataset, a main effect of sex on PVS VF ( $F(1,1381)=76.73$ ,  
23  $p<.0001$ ), PVS count ( $F(1,1381)=106.31$ ,  $p<.0001$ ), and mean PVS solidity ( $F(1,1381)=77.85$ ,  
24  $p<.0001$ ) were observed in the BG after controlling for age, scanner type and BG volume, where  
25 males had significantly larger PVS VF and count and smaller mean PVS solidity compared to  
26 females. The main effect of sex on mean PVS diameter in the BG did not survive multiple



1 comparison correction ( $F(1,1381)=7.27, p=.007$ ). Within white matter, a significant effect of sex  
2 on mean PVS solidity ( $F(1,1381)=63.83, p<.0001$ ) and PVS VF ( $F(1,1381)=24.51, p<.0001$ ) was  
3 observed, where males had larger PVS VF and smaller mean PVS solidity compared to females  
4 after controlling for age, scanner type and total white matter volume. The main effect of sex on  
5 white matter PVS count ( $F(1,1381)=5.36, p=.02$ ), and mean diameter ( $F(1,1381)=4.64, p=.03$ ) did  
6 not survive multiple comparison correction. The main effect of sex on PVS morphological features  
7 for each cohort are shown in **Table 4**.

8 While PVS burden in the BG was consistently larger in males compared to females across  
9 the lifespan (*SI Appendix, Fig. S2*), differences in the age-related trajectories of PVS  
10 morphological alterations were observed between sexes in the white matter (*SI Appendix, Fig.*  
11 **S3**). After controlling for covariates, a significant interaction between age and sex on white matter  
12 PVS VF ( $F(3,1381)=17.62, p<.0001$ ) was observed, such that the covariate-adjusted rate of  
13 increase in PVS VF was greater in females ( $\beta=2.13 \times 10^{-4}, t(782)=34.30, p<.0001$ , adjusted  
14  $R^2=.60$ ), compared to males ( $\beta=1.75 \times 10^{-4}, t(603)=24.11, p<.0001$ , adjusted  $R^2=.49$ ). Similarly,  
15 an interaction between age and sex on PVS diameter was also observed ( $F(3,1381)=21.95,$   
16  $p<.0001$ ), where the adjusted mean diameter increased faster with age in females ( $\beta=.014,$   
17  $t(782)=20.53, p<.0001$ , adjusted  $R^2=.34$ ), compared to males ( $\beta=.009, t(603)=11.14, p<.0001,$   
18 adjusted  $R^2=.17$ ). The cohort-stratified analyses also show males have significantly greater PVS  
19 VF and larger mean diameters compared to females in HCP-D and HCP-YA, while no significant  
20 sex differences were observed in HCP-A (*SI Appendix, Table S1*). No significant interactions  
21 between age and sex were observed for the remaining PVS features.

22

### 23 *PVS associations with vascular risk factors*

24 The HCP-YA and HCP-A cohorts were combined into a single dataset ( $n=918$ ) to assess  
25 the influence of vascular risk factors on PVS enlargement patterns across the lifespan after

1 controlling for age, sex and scanner type in the analyses. BMI showed the strongest associations  
2 with PVS morphology in the white matter (**SI Appendix, Figure S4**)

3 Within the white matter, BMI was significantly associated with larger PVS VF  
4 ( $F(7,911)=36.02$ ,  $p<.0001$ ) and count ( $F(7,911)=73.11$ ,  $p<.0001$ ) and reduced mean diameter  
5 ( $F(7,911)=13.22$ ,  $p=.0003$ ) and solidity ( $F(7,911)=102.78$ ,  $p<.0001$ ) after controlling for age, sex  
6 and scanner environment. A significant interaction between BMI and age was observed for PVS  
7 diameter in the white matter ( $F(8,910)=6.83$ ,  $p=.009$ ), where PVS diameter increased faster with  
8 age in healthy weight participants (BMI<25) compared to overweight and obese participants  
9 (BMI>25). Within the BG, no significant relationship between PVS morphology and BMI was  
10 observed.

11 Elevated blood pressure (>130/80 mmHg) was significantly associated with increased  
12 PVS VF in the white matter ( $F(7,674)=14.85$ ,  $p=.0001$ ). No morphological features in the BG were  
13 significantly associated with blood pressure status. The full model that consists of age, sex, BMI,  
14 scanner type, systolic blood pressure and diastolic blood pressure accounts for 46% of the  
15 variance in PVS VF ( $F(8,909)=96.27$ ,  $p<.001$ ). BMI explained 1.6% of the unique variance in PVS  
16 VF, while systolic and diastolic blood pressure account for .3% and .02% of the variance,  
17 respectively.

18

### 19 *PVS morphological associations*

20 Participants with increased PVS burden in the white matter also tended to have increased  
21 PVS burden in the BG (**Fig. 7**). PVS morphological features were also significantly correlated with  
22 one another within the BG (**SI Appendix, Fig. S5**) and subcortical white matter (**SI Appendix,**  
23 **Fig. S6**), where PVS VF was associated with increased mean diameter and count and decreased  
24 mean solidity. In order to better understand the contribution of PVS morphological features to  
25 alterations in the overall volume of the PVS, multiple linear regression was carried out on  
26 standardized variables to predict the PVS VF from PVS count, diameter and solidity. Within the

1 BG, PVS count, mean diameter and mean solidity collectively account for 82% of the variance in  
2 PVS VF ( $F(3,1385)=2098$ ,  $p<.0001$ , adjusted  $R^2=.819$ ). Mean PVS diameter has the highest  
3 predictive power ( $\beta=.549$ ,  $t(1385)=35.49$ ,  $p<.0001$ ), followed by PVS count ( $\beta=.449$ ,  
4  $t(1385)=31.76$ ,  $p<.0001$ ), and mean PVS solidity ( $\beta=.128$ ,  $t(1385)=7.06$ ,  $p<.0001$ ). PVS mean  
5 diameter and PVS count explain 16% and 13% of the unique variance in PVS VF, respectively,  
6 while mean PVS solidity explains 1% of the unique variance in PVS VF. Relative importance  
7 analysis was used to understand the extent to which each PVS morphological feature drives the  
8 prediction of PVS volume in the multiple regression model. Mean PVS diameter contributes .327  
9 (95% CI = [.295, .358]) to the total proportion of variance, while PVS count and mean solidity  
10 contribute .251 [.230, .276] and .241 [.225, .257], respectively.

11 Within the white matter, PVS count, mean diameter and mean solidity account for 84% of  
12 the variance in PVS VF ( $F(3,1385)=2424$ ,  $p<.0001$ , adjusted  $R^2=.839$ ). Mean PVS diameter has  
13 the highest standardized beta in multiple regression ( $\beta=.498$ ,  $t(1385)=42.76$ ,  $p<.0001$ ), followed  
14 by count ( $\beta=.377$ ,  $t(1385)=19.21$ ,  $p<.0001$ ), and mean solidity ( $\beta=.285$ ,  $t(1385)=15.20$ ,  $p<.0001$ ).  
15 Mean PVS diameter explains 21.12% of the unique variance in PVS VF, while PVS count and  
16 mean solidity account for 4% and 3%, respectively. Relative importance analysis shows mean  
17 PVS diameter contributes .315 (95% CI = [.288, .340]) to the total proportion of variance, while  
18 PVS count and mean PVS solidity contribute .301 [.284, .319] and .224 [.206, .240], respectively.

19

## 20 Discussion

21 We utilized an automated processing approach to automatically delineate and quantify  
22 PVS morphology in the BG and white matter to model PVS enlargement trajectories over an 80-  
23 year period of the lifespan. PVS visibility increases with age and is characterized by increased  
24 PVS volume fraction, count and caliber and decreased solidity. Furthermore, variability in PVS  
25 enlargement patterns is partially explained by anatomical location, sex and BMI. These findings  
26 are corroborated by previous studies that have found PVS visibility is apparent in children and

1 adolescents (Groeschel et al., 2006; Piantino et al., 2020; Rollins et al., 1993) and increases with  
2 age in cognitively normal young adults (Barisano et al., 2020; Choi et al., 2020) and elderly  
3 subjects (Francis et al., 2019; Gutierrez et al., 2013; Huang et al., 2021; A. Laveskog et al., 2018;  
4 Yakushiji et al., 2014; Zhu et al., 2011, 2010). The present study builds upon these previous  
5 studies by considering PVS structure using multiple morphological characteristics across a broad  
6 age range in order to more specifically describe the time course of PVS alterations in healthy  
7 aging. Our finding of increased PVS count and caliber across the lifespan suggests the observed  
8 expansion of the PVS VF in previous studies is likely attributed to widening of the PVS, and not  
9 due to decreased tissue volume associated with age-related brain atrophy.

10         Increased visibility of PVS has been associated with a multitude of neurological conditions;  
11 however, it is unclear if PVS enlargement as a consequence of normal aging reflects  
12 neuropathology. Several factors may contribute to age-related enlargement of PVS, including  
13 physical alterations that disrupt bulk flow, such as changes to CSF pressure and peri-arterial  
14 blockages (Jessen et al., 2015). Previous studies have also shown normal aging is associated  
15 with impairments to the paravascular clearance pathway (Kress et al., 2014) due to age-related  
16 alterations in CSF production (Fleischman et al., 2012), arterial pulsatility (Zieman et al., 2005)  
17 and blood-brain barrier permeability (Farrall and Wardlaw, 2009). Therefore, it is hypothesized  
18 that age-related PVS enlargement may result in reduced fluid exchange and elimination from the  
19 brain indicative of dysfunctional waste clearance (Jessen et al., 2015; Mestre et al., 2017; Troili  
20 et al., 2020; Wardlaw et al., 2020). Because the highest risk factor for the development of  
21 neurodegenerative diseases is aging, such alterations to waste clearance mechanisms are  
22 speculated to contribute to the accumulation of protein aggregates and thus render the brain more  
23 vulnerable to neurodegenerative pathology or escalate the progression of pre-existing cognitive  
24 deficits (Jessen et al., 2015; Sweeney et al., 2018).

25         While PVS alterations were observed globally across the lifespan, distinct morphological  
26 trajectories were observed in the PVS of the BG and white matter. Age-related increases to PVS

1 VF in the BG was predominantly observed in older adults within the HCP-A cohort, which  
2 coincided with wider diameters and, to a lesser extent, a larger number of visible PVS.  
3 Conversely, PVS VF in white matter increased linearly with age across the lifespan and was  
4 mainly attributed to increased PVS caliber, though PVS count increased up until middle age. We  
5 suspect the differing trajectories of PVS expansion may be attributed to differences in the  
6 anatomical characteristics that define vasculature in these structures, such as the cerebral  
7 arteries that feed into the network of perforating blood vessels that the PVS surround. BG PVS  
8 surround lenticulostriate arteries that branch from the M1 segment of the middle cerebral artery  
9 (MCA) (Marinković et al., 2001), which is the most pathologically affected vascular territory in the  
10 brain (Ng et al., 2007; Zaidat et al., 2014). There is converging evidence from several studies that  
11 show vascular pathologies are selectively associated with PVS enlargement in the BG, but not  
12 white matter (Charidimou et al., 2017, 2013; Doubal et al., 2010; Martinez-Ramirez et al., 2013;  
13 Potter et al., 2015). Because the risk for cerebrovascular disease increases with advancing age  
14 (Hauer et al., 2017), it is possible that the accelerated BG PVS enlargement observed in older  
15 subjects may be due, in part, to the increased incidence of pathological vascular influences in the  
16 aging cohort; however, we do not have sufficient information regarding vascular risk factors in this  
17 cohort to confirm this.

18 Conversely, white matter PVS envelop arteries that originate from multiple major cerebral  
19 arteries. The anterior cerebral artery (ACA) supplies blood vessels to anterior-frontal regions  
20 around the interhemispheric fissure, the MCA supplies parietal, temporal and inferior frontal  
21 regions via the M4 cortical segment and the posterior cerebral artery (PCA) supplies occipital  
22 regions (Kim et al., 2019). PVS were not uniformly distributed across the white matter, as we  
23 found frontal, parietal and cingulate regions had the highest PVS burden, while occipital and  
24 temporal regions have the lowest PVS burden bilaterally. Our findings are in line with previous  
25 studies that show the highest PVS burden in frontal and parietal lobes across all age groups  
26 (Barisano et al., 2020; Bouvy et al., 2014; A. Laveskog et al., 2018; Piantino et al., 2020).

1 Additionally, a recent study in young adults found PVS VF in regions supplied by the ACA and  
2 MCA is elevated compared to those supplied by the PCA (Zong et al., 2020). Overall, we observed  
3 regionally-dependent patterns of PVS enlargement trajectories across the lifespan, where PVS  
4 levels in childhood were inversely correlated with the rate of growth. Regions fed by the ACA,  
5 such as cingulate and prefrontal white matter, have elevated PVS VF in childhood that remains  
6 relatively constant across the lifespan, while temporal, inferior frontal and lateral occipital regions  
7 supplied by the MCA have low PVS VF in childhood and undergo rapid enlargement across the  
8 lifespan. Medial occipital regions supplied by the PCA are an exception to this trend, as PVS VF  
9 levels remain low across the lifespan. Together, our findings suggest the mechanisms that  
10 contribute to age-related PVS enlargement differ according to the cerebral arteries that support  
11 each region.

12         It is unclear if the age-related increase in PVS cross-section diameter reflects pathological  
13 enlargement. From childhood to advancing age, the mean PVS diameter in the present study  
14 ranges from 1.85 mm to 2.36 mm in the white matter and 1.32 mm to 1.66 mm in the basal ganglia.  
15 Previous MRI studies acquired at 3T have similarly found the majority of PVS have a maximum  
16 diameter of 3 mm (Del C. Valdes Hernandez et al., 2013; Troili et al., 2020); however, it is likely  
17 that many more PVS go undetected in the brain due to limitations in the spatial resolution afforded  
18 by clinical MRI scanners. PVS with sub-millimeter diameters have been observed with ultra-high  
19 field MRI (Barisano et al., 2021), which provides significantly improved visualization of small PVS,  
20 and histological studies in vascular tissue suggest the majority of PVS diameters range from .13  
21 to .96 mm (Pesce and Carli, 1988). Due to the preponderance of small-caliber PVS in the brain  
22 that are undetectable at the current resolution, it is feasible that the observed PVS diameter  
23 enlargement may be attributed to the simultaneous expansion of multiple neighboring PVS, thus  
24 resulting in the appearance of a single larger PVS (Barisano et al., 2021).

25         Our finding of increased PVS count with age corroborates previous studies (Bouvy et al.,  
26 2014; Zong et al., 2020) and is likely attributed to increased visibility of pre-existing PVS, as

1 opposed to the formation of new ones, because PVS spatially localize with penetrating arterioles  
2 and venules that remain static across age. Consistent with our findings of a strong correlation  
3 between PVS count and mean diameter, increased PVS count could therefore reflect increased  
4 caliber of small PVS previously undetectable with MRI. The age-related increase in PVS count  
5 may also be attributed to discontinuities in PVS visibility, where a single PVS is delineated as  
6 multiple disconnected segments. While discontinuities may be attributed to partial volume effects  
7 in small PVS, others have suggested PVS enlargement can manifest as focal dilations (Wardlaw  
8 et al., 2013) that may be visualized as several separate segments. This latter interpretation is  
9 supported by our finding of age-related reductions in PVS solidity, a measure that describes  
10 shape complexity based on the fraction of voxels enclosed within the smallest complex polygon,  
11 where low solidity tends to describe highly tortuous paths (Westrate et al., 2014). Previous studies  
12 have similarly found increased arterial tortuosity with aging (Cha et al., 2003; Del Corso et al.,  
13 1998; Schnerr et al., 2017). It is unclear whether the increased complexity of the PVS observed  
14 in the present study is due to alterations to the PVS itself, through focal dilations and degradation,  
15 or if it is guided by the underlying structure of the vasculature. Together, our finding of increased  
16 PVS VF, count and diameter accompanied by decreased solidity across the lifespan point towards  
17 age-related enlargement and possibly degradation of PVS.

18 Inter-subject variability in PVS morphology is partially explained by sex and body mass,  
19 but not blood pressure. Previous studies have shown PVS volumes are larger in males compared  
20 to females in adult (Barisano et al., 2020; Zhu et al., 2010) and aging subjects (Ramirez et al.,  
21 2015). While we found PVS VF was significantly larger in males compared to females in the white  
22 matter and BG, males also had significantly more PVS compared to females in the BG,  
23 specifically. Androgen and estrogen receptors on vascular endothelial cells act as direct targets  
24 for circulating sex hormones (Zuloaga et al., 2012b, 2012a) and the relative distributions of these  
25 hormones across the lifespan may contribute to the observed PVS sex differences. While  
26 androgens have been shown to protect the blood-brain barrier (Atallah et al., 2017), they can also

1 adversely affect vasculature through neuroinflammatory stimulation (Gonzales et al., 2009) and  
2 vasoconstriction (Gonzales et al., 2004). Therefore, the unique actions of circulating androgens  
3 on the cerebrovascular system may further exacerbate age-related PVS enlargement in males.  
4 We also found age-related increases to the volume and diameter of white matter PVS occur more  
5 rapidly in females compared to males, where PVS burden in females is lower in childhood and  
6 adulthood and equalizes with males in older subjects. Estrogen is atheroprotective and has been  
7 shown to suppress the cerebrovascular inflammatory response (Razmara et al., 2008; Sunday et  
8 al., 2006), reduce blood-brain barrier permeability (Burek et al., 2010) and induce vasodilation  
9 (Murata et al., 2013). However, the protective effects of estradiol wanes with age as the gonadal  
10 production of sex hormones declines after menopause (Wildman et al., 2008) and is reflected by  
11 an age-related increase in blood-brain barrier permeability in females compared to males (Liu et  
12 al., 2009). Therefore, the accelerated PVS enlargement in females compared to males across the  
13 lifespan may be attributed to age-related reductions in circulating estrogen levels.

14         Within the white matter, excess body mass was associated with increased PVS volume  
15 and count, but decreased diameter and slower enlargement patterns compared to normal weigh  
16 adults. These seemingly contradictory findings of increased PVS burden and decreased PVS size  
17 suggests excess body mass is associated with increased visibility of predominantly small  
18 diameter PVS. It is possible that the enlarged PVS observed in healthy weight adults may not  
19 represent vascular pathology but may instead reflect a phenomenon of normal aging. Our lack of  
20 a significant relationship between BMI and PVS morphology in the BG is surprising, given  
21 previous research that has shown both BMI (Arnoldussen et al., 2019) and lenticulostriate PVS  
22 (Francis et al., 2019) are tightly coupled with cerebrovascular risk factors. However, elevated BMI  
23 also promotes systemic inflammation, and previous studies have shown white matter PVS  
24 pathology in neuroinflammatory disease, such as multiple sclerosis. The variance in age-related  
25 PVS alterations was not adequately explained by blood pressure differences. There is strong  
26 evidence to link PVS size with hypertension, particularly within the BG; however, only 61



1 participants in the present study had high blood pressure (>140/90 mmHg) and it is likely that our  
2 study did not have sufficient subjects with clinical hypertension to detect PVS alterations related  
3 to high blood pressure. Therefore, our findings suggest that sub-clinical differences in blood  
4 pressure may not significantly contribute to PVS morphological variability.

5         While the current study utilizes a granular approach to explore the spatial distribution of  
6 PVS morphological characteristics across age, several limitations should be considered. HCP is  
7 a vast dataset acquired on different scanners at multiple sites and data for the developing and  
8 aging cohorts were acquired with slightly different MRI acquisitions than the young adult cohort.  
9 To overcome this, we employed robust post-processing harmonization techniques to account for  
10 differences in acquisitions and controlled for scanner type as a covariate of no interest in our  
11 analyses. Furthermore, we analyzed cohorts separately and found these results were consistent  
12 with our lifespan trends. Another limitation was the cross-sectional nature of our study and  
13 associations between PVS morphology and age point towards differences, not within-subject  
14 changes, across the lifespan. Our research is also limited by the spatial resolution afforded with  
15 clinically feasible MRI. In a recent simulation study, researchers found structural MRI data can  
16 accurately quantify PVS with diameters greater than twice the image resolution (Bouvy et al.,  
17 2014). Therefore, the presence of small PVS may lead to a systematic over-estimation of PVS  
18 diameters.

19         The present study sought to characterize the time course of PVS morphological alterations  
20 in the BG and subcortical white matter regions across the lifespan in a large cross-sectional cohort  
21 of ~1400 cognitively normal subjects. We found PVS within white matter regions and the BG  
22 undergo distinct age-related trajectories that may be indicative of their respective roles in  
23 pathological conditions characterized by failure of the waste clearance system. Furthermore, the  
24 rate of PVS enlargement in white matter regions were dependent on the degree of PVS burden  
25 in childhood, highlighting a critical link between perivascular physiology in childhood and in aging.  
26 The findings presented here will aid in our understanding of the role of PVS in health and disease

1 by providing a benchmark to which pathological PVS alterations can be compared. Therefore,  
2 future studies should aim to understand the pathophysiological and normative mechanisms that  
3 give rise to PVS enlargement in order to better assess its utility as a diagnostic biomarker for  
4 neurodegenerative and cerebrovascular disease.

5

## 6 **Materials and Methods**

### 7 *Study Participants*

8 Cognitively normal subjects from childhood through advanced age were recruited and scanned  
9 through the Washington University-University of Minnesota (WU-Minn) Human Connectome  
10 Project and the Lifespan Human Connectome Project in Development and Aging. Structural  
11 neuroimaging and demographic information from 1389 participants (784 females) across the  
12 lifespan were included in the present study ( $M\pm SD=34.17\pm 20.07$  years, 8.08 – 89.75 years)  
13 **(Table 1).**

14 HCP Development (HCP-D) The sample of typically developing children and adolescents used in  
15 the present study were derived from the Lifespan Human Connectome Project in Development  
16 (Somerville et al., 2018). Subjects were recruited and scanned in Boston, Los Angeles,  
17 Minneapolis and St. Louis. Participants were excluded if they were born premature, require  
18 special educational services, had MRI contraindications, or had a history of serious medical  
19 problems, head injury, endocrine disorders, psychiatric disorders, or neurodevelopmental  
20 disorders. The goal of the HCP-D was to enroll at least 1,300 participants; however, 655 subjects  
21 (332 female) with neuroimaging data were available at the time of this study. Of the participants  
22 originally considered, 140 subjects were excluded in the HCP-D 2.0 release of the data, 32 were  
23 excluded due to poor structural MRI data quality, 6 subjects were excluded due to processing  
24 pipeline failures, and 1 subject was excluded due to anatomical abnormalities, resulting in the  
25 inclusion of 471 subjects (260 female) from the HCP-D cohort in the present analyses  
26 ( $M\pm SD=14.36\pm 3.77$  years, 8.08 – 21.92 years).

1 HCP Young Adults (HCP-YA) The sample of healthy young adults were acquired through the WU-  
2 Minn Human Connectome Project at Washington University in St. Louis (Van Essen et al., 2013).  
3 HCP-YA utilized the same exclusionary criteria as the HCP-D; HCP-YA also excluded subjects  
4 with scores below 25 on the mini-mental state exam (MMSE). The study aimed to recruit 1,200  
5 subjects; however, 1112 subjects with neuroimaging data were available at the time of the present  
6 study. Of those considered, 51 subjects were excluded due to poor structural data quality, 643  
7 subjects were randomly excluded due to familial relationships with other participants (siblings),  
8 12 subjects were excluded due to processing pipeline failures, and 1 subject was excluded due  
9 to anatomical abnormalities, resulting in a total of 405 subjects from the HCP-YA cohort (226  
10 females) used in the present analyses ( $M\pm SD=28.73\pm 3.78$  years, 22.00 – 37.00 years).

11 HCP Aging (HCP-A) The sample of cognitively normal aging adults older than 36 years of age  
12 were acquired through the Lifespan Human Connectome Project in Aging (Bookheimer et al.,  
13 2019). Participants were recruited and scanned at Washington University St Louis, University of  
14 Minnesota, Massachusetts General Hospital and the University of California Los Angeles. In  
15 addition to the exclusionary criteria listed for HCP-D and HCP-YA, individuals with impaired  
16 cognitive abilities were excluded from HCP-A according to tiered age-appropriate cut-off scores.  
17 While over 1,200 subjects will ultimately be enrolled in the study, there were 687 subjects with  
18 neuroimaging data available at the time of analysis. Of those originally considered, 105 subjects  
19 were excluded following the 2.0 release of the HCP-A dataset, 49 were additionally excluded due  
20 to poor structural data quality following quality assurance purposes, 19 subjects were excluded  
21 due to processing pipeline failures, and 1 subject was excluded due to anatomical abnormalities,  
22 resulting in the inclusion of a total of 513 subjects (298 females) from the HCP-A cohort in the  
23 present analyses ( $M\pm SD=56.35\pm 13.65$  years, 36.00 – 89.75 years).

24

25 *MRI Acquisition*

1 HCP-YA Participants were scanned on a Siemens 3T Connectome Skyra with a 100 mT gradient  
2 coil and a 32-channel Siemens receive head coil (Glasser et al., 2013). B0 field maps, B1- and  
3 B1+ maps were collected to correct for readout distortion and intensity inhomogeneities. T1-  
4 weighted (T1w) images were collected as a 3D single-echo magnetization prepared – rapid  
5 gradient echo (MP-RAGE) images with the following acquisition parameters: voxel size=.7 mm  
6 isotropic, FOV = 224 mm, matrix = 320, 256 sagittal slices per slab, TR = 2400 ms, TE = 2.14 ms,  
7 TI = 1000 ms, FA = 8 degrees, Bandwidth = 210 Hz per pixel, echo spacing = 7.6 ms, GRAPPA  
8 factor = 2, 10% phase encoding oversampling (A-P), dwell time=7.4  $\mu$ s. T2-weighted (T2w)  
9 images were collected as 2 variable flip angle turbo spin-echo sequences averaged together with  
10 the following acquisition parameters: voxel size=.7 mm isotropic, FOV = 224 mm, matrix = 320,  
11 256 sagittal slices per slab, TR = 3200 ms, TE = 565 ms, BW = 744 Hz/pixel, no fat suppression  
12 pulse, GRAPPA = 2, turbo factor = 314, echo train length = 1105 echoes, 10% phase encoding  
13 oversampling, dwell time = 2.1  $\mu$ s.

14 HCP-D and HCP-A Slight variations in the acquisition parameters were made for the HCP-A and  
15 HCP-D cohorts to accommodate the unique challenges of working with young and elderly  
16 populations (Harms et al., 2018). HCP-D and HCP-A participants were scanned on a variant of  
17 the HCP-YA Connectome scanner, the Siemens 3T Prisma with an 80 mT/m gradient coil and a  
18 Siemens 32-channel Prisma head coil. T1w multi-echo MP-RAGE scans were acquired with the  
19 following acquisition parameters: voxel size=.8 mm isotropic, 4 echoes per line of k-space, FOV  
20 = 256 x 240 x 166 mm, matrix = 320 x 300 x 208 slices, 7.7% slice oversampling, GRAPPA = 2,  
21 pixel bandwidth = 744 Hz/pixel, TR = 2500 ms, TI = 1000 ms, TE = 1.8/3.6/5.4/7.2 ms, FA = 8  
22 degrees. Motion-induced re-acquisition were allowed for up to 30 TRs. T2w turbo spin echo (TSE)  
23 scans were collected from each subject with the following acquisition parameters: voxel size=.8  
24 mm isotropic, 4 echoes per line of k-space, FOV = 256 x 240 x 166 mm, matrix = 320 x 300 x 208  
25 slices, 7.7% slice oversampling, GRAPPA = 2, pixel bandwidth = 744 Hz/pixel, TR = 3200 ms, TE  
26 = 564 ms, turbo factor = 314. Motion-induced re-acquisition were allowed up to 25 TRs.

1

## 2 *Quality assurance procedures*

3 Prior to data processing and PVS segmentation, all T1w and T2w images were visually inspected  
4 and scans with poor data quality were excluded from analyses. Poor scan quality was  
5 characterized by T1w, T2w or EPC volumes with excessive head motion, reduced GM/WM tissue  
6 contrast, unidentifiable anatomy, blurred images and salt-and-pepper noise, which obstructed the  
7 visibility of PVS. Additionally, EPC images with contrast inhomogeneities due to slight variations  
8 in T1w and T2w data quality or registration failures were excluded.

9

## 10 *MRI data preprocessing*

11 All T1w and T2w images were preprocessed using the HCP minimal processing pipeline version  
12 4.0.1(Glasser et al., 2013) in parallel with the LONI pipeline (Dinov et al., 2009) . HCP-A and  
13 HCP-D structural images were re-sampled to a spatial resolution of .7 mm isotropic to match that  
14 of HCP-YA. Following gradient distortion correction, T2w images were aligned to T1w images  
15 using rigid body registration and then images were transformed to MNI space and brought into  
16 alignment with the anterior and posterior commissure (ACPC). Brain extraction and readout  
17 distortion correction using a field map were then carried out. T2w images were registered to  
18 subject T1w native space using boundary-based registration (BBR) with 6 degrees of freedom  
19 (Greve and Fischl, 2009). T1w and T2w images were corrected for readout distortion using the  
20 receive (B1-) and transmit (B1+) field maps and then registered to MNI space with an affine  
21 transformation implemented with FLIRT followed by a nonlinear registration implemented with  
22 FNIRT.

23

## 24 *Subcortical segmentation*

25 In order to characterize regional subcortical PVS features, T1w images were processed with  
26 Freesurfer version 6 (<http://surfer.nmr.mgh.harvard.edu/>). Images were first downsampled to a

1 voxel size of 1 mm isotropic to accommodate spatial resolution limitations of Freesurfer (Glasser  
2 et al., 2013). Data processing included motion correction, intensity normalization, removal of non-  
3 brain tissue and automated Talairach transformation (Reuter et al., 2010; Segonne et al., 2004;  
4 Sled et al., 1998). Subcortical white matter and BG were segmented using an atlas-based  
5 approach (Fischl et al., 2004, 2002). Subcortical white matter was further parcellated into 68  
6 regional volumes (34 regions per hemisphere) labeled according to the nearest cortical label  
7 (Fischl et al., 2004, 2002) defined by the Desikan-Killiany atlas (Desikan et al., 2006).

8

### 9 *Perivascular space segmentation*

10 PVS were automatically segmented and quantified using the processing technique described  
11 in (Sepehrband et al., 2019). Adaptive non-local mean filtering using image self-similarity  
12 properties was applied to the co-registered and bias field-corrected T1w and T2w images (Manjón  
13 et al., 2010). In order to increase visibility of the PVS in the subcortical white matter and BG for  
14 segmentation, an enhanced PVS contrast (EPC) was then generated by dividing the T1w image  
15 by the T2w image (Sepehrband et al., 2019).

16 Frangi filters (Frangi et al., 1998) were applied to the EPC using the Quantitative Imaging Toolkit  
17 (QIT) (Cabeen et al., 2018) to create PVS vesselness maps, which describes the extent to which  
18 a voxel corresponds to the tubular structure of the PVS. Frangi filter parameters were set to default  
19 values of  $\alpha = \beta = 0.5$  and  $c$  was set to half the maximum Hessian norm according to Frangi *et al.*  
20 (1998) (Frangi et al., 1998). The vesselness scale ranged from 0.1 to 5 voxels. Binary PVS maps  
21 were generated by thresholding the vesselness maps using a value optimized for the highest  
22 concordance and correlation with PVS counts from expert readers (scaled  $t = 1.5$ ). The CSF  
23 volumetric mask generated by Freesurfer was dilated using a spherical kernel with a 1.4 mm  
24 radius and used to exclude voxels at the interface between white matter and ventricles to avoid  
25 incorrect classification of outside tissue voxels.

1 White matter hyperintensities (WMH) are anomalous structural features indicative of tissue  
2 pathology (Wardlaw et al., 2015). WMH is more common in the normal aging brain compared to  
3 younger brains (Zhuang et al., 2018) and has a similar contrast to PVS. While vesselness  
4 thresholding excludes most large globular WMH from consideration during PVS segmentation,  
5 incorrect classification of some small WMH as PVS remains a possibility. The influence of WMH  
6 on PVS segmentation was assessed in a subset of 184 participants (91 HCP-A, 50 HCP-YA, and  
7 43 HCP-D subjects), where PVS maps were visually inspected and manually edited to remove  
8 segmentation false positives by a group of 4 trained raters, including WMH, ventricular walls due  
9 to inaccurate tissue segmentation and other erroneously labeled regions with hyper-intense EPC  
10 contrast. To ensure consistency among raters, 33% of the subjects were inspected by more than  
11 one rater. The corrected and uncorrected PVS maps were compared to determine if manual  
12 correction significantly improves analyses. The severity of WMHs in the EPC contrast was scored  
13 on a scale from 0 to 3 based on the number and size of WMH using the Fazekas scale (Prins and  
14 Scheltens, 2015), where 0 represents a scan with no identifiable WMH and 3 reflects several large  
15 WMHs. Out of the subjects randomly selected for analysis, 153 (83%) did not present with any  
16 observable WMH, while 11 (5.9%) were noted to have moderate (8 HCP-A subjects) or severe (3  
17 HCP-A subjects) WMH. Overall, the false positive rate across all cohorts was 4.5% (HCP-D: 4.1%,  
18 HCP-YA: 7.3%, HCP-A: 3.1%). WMH severity was not significantly correlated with the PVS  
19 segmentation false positive rate ( $r(182)=.06$ ,  $p=.40$ ). Therefore, it is unlikely that PVS  
20 segmentation false positives due to increased WMH burden in older adults contributes to the  
21 observed age-related PVS alterations in the present study.

22

### 23 *Perivascular space feature extraction*

24 The PVS volume fraction was defined as fraction of the volume of space occupied by PVS and  
25 was calculated by dividing the PVS volume by the subcortical white matter and basal ganglia  
26 volume. The PVS morphological properties of count, mean diameter and mean solidity were

1 extracted from the 3-D volumetric mask of PVS using the Matlab function *regionprops3*. The PVS  
2 count summed up the number of contiguous PVS-labeled voxels within a given region of interest.  
3 PVS diameter reflects the average cross-sectional diameter and is calculated using the mean of  
4 the second and third principal eigenvectors of an ellipsoid constructed with the same normalized  
5 second central moments as the segmented PVS. The PVS solidity corresponds to the proportion  
6 of the PVS-labeled voxels within the convex hull that contains a given PVS segment. Because  
7 segmented PVS are not always cluster of voxels, The PVS mean solidity was calculated on PVS  
8 with a length of 5 contiguous voxels or greater. For analyses, the mean PVS solidity and PVS  
9 diameter are provided for each white matter and BG region of interest.

10

#### 11 *Vascular risk factors*

12 To assess the influence of vascular risk factors on PVS morphology, a portion of the analyses  
13 were performed in a subset of the HCP Lifespan that consisted of subjects older than 21 years of  
14 age in the HCP-YA and HCP-A cohorts ( $n=918$ ).

15 Body mass index (BMI) was calculated from height (cm) and weight (kg) measurements collected  
16 during participant interviews using the equation:  $BMI = (\text{weight})/(\text{height})^2$ . Participants were  
17 stratified into BMI groups according to World Health Organization (WHO) criteria for weight  
18 categories (“Obesity: preventing and managing the global epidemic. Report of a WHO  
19 consultation.,” 2000): (1) a “high” BMI group ( $n=529$ , 21.8 – 87.75 years,  $45.2\pm 17.2$  years) that  
20 included subjects described as “overweight” or “obese” with BMI greater than or equal to 25  
21  $\text{kg}/\text{cm}^2$  ( $25\text{--}45.17 \text{ kg}/\text{cm}^2$ ,  $29.8\pm 4.0 \text{ kg}/\text{cm}^2$ ) (and (2) a “low” BMI group ( $n=390$ , 21.8 – 89.8 years,  
22  $43.1\pm 17.5$  years) that includes subjects described as “healthy” with BMI less than 25  $\text{kg}/\text{cm}^2$   
23 ( $16.6\text{--}24.9 \text{ kg}/\text{cm}^2$ ,  $22.4\pm 1.8 \text{ kg}/\text{cm}^2$ ).

24 Systolic and diastolic blood pressure were measured from participants in the seated position. To  
25 assess the influence of blood pressure on age-related PVS morphological alterations, subjects  
26 were stratified into groups: (1) A normal blood pressure group where systolic and diastolic blood



1 pressure was less than 130 mmHg and 80 mmHg, respectively ( $n=297$ , 21.8-89.8 years,  
2  $39.2\pm 14.2$  years) and (2) An elevated blood pressure group where systolic and diastolic blood  
3 pressure was greater than or equal to 130 mmHg and 80 mmHg, respectively ( $n=384$ , 22.8-86.5  
4 years,  $46.2\pm 16.9$  years), per the American Heart Association guidelines (Whelton et al., 2018)

## 5 6 *Statistical analysis*

7 In order to assess age-related alterations to PVS features (mean cross-sectional diameter, mean  
8 solidity, count and VF) across the lifespan, the HCP lifespan cohorts were analyzed both  
9 separately and combined as a single dataset. In an effort to adjust for non-biological sources of  
10 variance inherent in multi-site research studies, PVS morphometric features were first harmonized  
11 using ComBat-GAM (<https://github.com/rpomponio/neuroHarmonize>). ComBat-GAM is an  
12 extension of the batch effect correction tool ComBat commonly used in genomics and recently  
13 developed to account for multi-site scanner effects. It has been previously shown that ComBat  
14 removes unwanted scanner effects, while preserving biological associations, in a large multi-study  
15 analysis that investigated cortical thickness in health and disease (Fortin et al., 2018). ComBat-  
16 GAM was run within an empirical Bayes framework, which assumes features share the same  
17 common distribution, and utilized a generalized additive model (GAM) with a penalized non-linear  
18 term to model the dynamic age effects typically observed across the lifespan (Pomponio et al.,  
19 2020). ComBat-GAM was applied to the PVS metrics extracted from the BG and white matter  
20 regions to correct for HCP cohort effects while preserving the effects of sex and the nonlinear  
21 effects of age.

22 Statistical analysis was then carried out with R version 3.1.2. In the combined dataset, the main  
23 effect of sex and age\*sex interaction on harmonized PVS features after controlling for covariates  
24 was assessed with ANCOVA. For the main effect of age, Bayesian information criteria (BIC) was  
25 used to identify the model that accounts for the most age-related variance in PVS morphology  
26 among the following 4 models typically used to characterize lifespan trajectories: (1) linear

1 regression, (2) second-order polynomial model, (3) Poisson curve, and (4) nonlinear growth  
2 curve. For the PVS features within the total white matter and BG, the best fit models were either  
3 linear regression ( $PVS = B_0 + B_1 \cdot \text{age}$ ) or the second-order polynomial model ( $PVS = B_0 + B_1 \cdot \text{age}$   
4  $+ B_2 \cdot \text{age}^2$ ). A nonlinear growth curve of the form  $PVS = ae^{k \cdot \text{age}}$  was fit for each parcellated white  
5 matter region to explain the relationship between PVS VF and age in order to compare the rate  
6 of PVS VF change among regions, where  $k$  reflects the growth rate. The 95% confidence interval  
7 for each growth model coefficient and predicted age at 8 years of age were generated with  
8 bootstrap resampling with replacement ( $N=10,000$ ). Statistical tests were corrected for multiple  
9 comparisons using a Bonferroni-adjusted significance threshold of  $p < .006$  ( $.05/8$ ).  
10 Statistical tests for the main effects of age and sex on PVS features in the white matter and BG  
11 were also replicated separately within each HCP cohort. The following general linear model (stats  
12 v.3.6.2) was fit for each cohort separately to assess the influence of age on PVS structure:  $PVS$   
13  $= B_0 + B_1 \cdot \text{age} + B_2 \cdot \text{sex} + B_3 \cdot \text{scanner} + B_4 \cdot \text{volume}$ , where the dependent variable reflects the PVS  
14 morphological feature of interest and sex, scanner type and total tissue volume of either the white  
15 matter or BG are covariates of no interest. The main effect of sex after accounting for age, scanner  
16 type and tissue volume were assessed with analysis of covariance (ANCOVA). Statistical tests  
17 were corrected for multiple comparisons (3 cohorts x 4 PVS features x 2 structures) using a  
18 Bonferroni-adjusted significance threshold of  $p < .002$  ( $.05/24$ ).

19

## 20 **Data sharing plans**

21 All data used in this study is available through the Human Connectome Project (HCP)  
22 (<https://www.humanconnectome.org/>). The HCP Young Adult 1200 Subject Release (S1200) can  
23 be downloaded at ConnectomeDB (<https://db.humanconnectome.org/>). The Lifespan HCP  
24 datasets (HCP Aging and HCP Development) can be accessed through the Connectome  
25 Coordination Facility (CCF) in the NIMH Data Archive (NDA) at <https://nda.nih.gov/ccf> (DOI:

1 [10.15154/1524651](https://doi.org/10.15154/1524651)). Normative PVS data for brain regions across age groups will be made  
2 available through an online portal for data discovery.

3

#### 4 **References**

- 5 Arnoldussen IAC, Gustafson DR, Leijssen EMC, de Leeuw F-E, Kiliaan AJ. 2019. Adiposity is  
6 related to cerebrovascular and brain volumetry outcomes in the RUN DMC study.  
7 *Neurology* **93**:e864–e878. doi:10.1212/WNL.0000000000008002
- 8 Atallah A, Mhaouty-Kodja S, Grange-Messent V. 2017. Chronic depletion of gonadal  
9 testosterone leads to blood–brain barrier dysfunction and inflammation in male mice.  
10 *Journal of Cerebral Blood Flow and Metabolism* **37**:3161–3175.  
11 doi:10.1177/0271678X16683961
- 12 Bacyinski A, Xu M, Wang W, Hu J. 2017. The Paravascular Pathway for Brain Waste  
13 Clearance : Current Understanding , Significance and Controversy. *Frontiers in*  
14 *Neuroanatomy* **11**:1–8. doi:10.3389/fnana.2017.00101
- 15 Banerjee G, Kim HJ, Fox Z, Ja HR, Wilson D, Charidimou A, Na HK, Na DL, Seo SW, Werring  
16 DJ. 2017a. MRI-visible perivascular space location is associated with Alzheimer’ s disease  
17 independently of amyloid burden. *Brain* **140**:1107–16. doi:10.1093/brain/awx003
- 18 Banerjee G, Kim HJ, Fox Z, Jager HR, Wilson D, Charidimou A, Na HK, Na DL, Seo SW,  
19 Werring DJ. 2017b. MRI-visible perivascular space location is associated with Alzheimer’s  
20 disease independently of amyloid burden. *Brain* **140**:1107–1116. doi:10.1093/brain/awx003
- 21 Barisano G, Law M, Custer RM, Toga AW, Seppehrband F. 2021. Perivascular Space Imaging at  
22 Ultrahigh Field MR Imaging. *Magnetic Resonance Imaging Clinics of North America* **29**:67–  
23 75. doi:10.1016/j.mric.2020.09.005
- 24 Barisano G, Sheikh-Bahaei N, Law M, Toga AW, Seppehrband F. 2020. Body mass index, time  
25 of day, and genetics affect perivascular spaces in the white matter. *Journal of Cerebral*  
26 *Blood Flow and Metabolism*. doi:10.1177/0271678X20972856
- 27 Bedussi B, Almasian M, Vos J De, Vanbavel E, Bakker ENTP. 2018. Paravascular spaces at  
28 the brain surface: Low resistance pathways for cerebrospinal fluid flow. *Journal of Cerebral*  
29 *Blood Flow & Metabolism* **38**:719–726. doi:10.1177/0271678X17737984
- 30 Bookheimer SY, Salat DH, Terpstra M, Ances BM, Barch DM, Buckner RL, Burgess GC, Curtiss  
31 SW, Diaz-Santos M, Elam JS, Fischl B, Greve DN, Hagy HA, Harms MP, Hatch OM,  
32 Hedden T, Hodge C, Japardi KC, Kuhn TP, Ly TK, Smith SM, Somerville LH, Uğurbil K,  
33 van der Kouwe A, Van Essen D, Woods RP, Yacoub E. 2019. The Lifespan Human  
34 Connectome Project in Aging: An overview. *NeuroImage* **185**:335–348.  
35 doi:10.1016/j.neuroimage.2018.10.009
- 36 Bouvy WH, Biessels GJ, Kuijf HJ, Kappelle LJ, Luijten PR, Zwanenburg JJM. 2014.  
37 Visualization of perivascular spaces and perforating arteries with 7 T magnetic resonance  
38 imaging. *Investigative Radiology* **49**:307–313. doi:10.1097/RLI.0000000000000027

- 1 Burek M, Arias-Loza PA, Roewer N, Förster CY. 2010. Claudin-5 as a novel estrogen target in  
2 vascular endothelium. *Arteriosclerosis, Thrombosis, and Vascular Biology* **30**:298–304.  
3 doi:10.1161/ATVBAHA.109.197582
- 4 Cabeen RP, Laidlaw DH, Toga AW. 2018. Quantitative imaging toolkit: Software for interactive  
5 3D visualization, data exploration, and computational analysis of neuroimaging datasets.
- 6 Cha KS, Kim MH, Kim HJ. 2003. Prevalence and clinical predictors of severe tortuosity of right  
7 subclavian artery in patients undergoing transradial coronary angiography. *American*  
8 *Journal of Cardiology* **92**:1220–1222. doi:10.1016/j.amjcard.2003.07.038
- 9 Charidimou A, Boulouis G, Pasi M, Etten ES Van, Haley K, Ayres A, Schwab KM, Greenberg  
10 SM. 2017. MRI-visible perivascular spaces in cerebral amyloid angiopathy and  
11 hypertensive arteriopathy. *American Academy of Neurology* **88**:1157–64.
- 12 Charidimou A, Hong YT, Jäger HR, Fox Z, Aigbirhio FI, Fryer TD, Menon DK, Warburton EA,  
13 Werring DJ, Baron J. 2015. White Matter Perivascular Spaces on Magnetic Resonance  
14 Imaging - Marker of Cerebrovascular Amyloid Burden? *Stroke* **46**:1707–1709.  
15 doi:10.1161/STROKEAHA.115.009090
- 16 Charidimou A, Meegahage R, Fox Z, Peeters A, Vandermeeren Y, Laloux P, Baron JC, Jäger  
17 HR, Werring DJ. 2013. Enlarged perivascular spaces as a marker of underlying  
18 arteriopathy in intracerebral haemorrhage: A multicentre MRI cohort study. *Journal of*  
19 *Neurology, Neurosurgery and Psychiatry* **84**:624–629. doi:10.1136/jnnp-2012-304434
- 20 Choi Yangsean, Nam Y, Choi Yera, Kim J, Jang J, Ahn KJ, Kim B soo, Shin NY. 2020. MRI-  
21 visible dilated perivascular spaces in healthy young adults: A twin heritability study. *Human*  
22 *Brain Mapping* **41**:5313–5324. doi:10.1002/hbm.25194
- 23 Del C. Valdes Hernandez M, Piper RJ, Wang X, Deary IJ, Wardlaw JM. 2013. Towards the  
24 automatic computational assessment of enlarged perivascular spaces on brain magnetic  
25 resonance images: A systematic review. *Journal of Magnetic Resonance Imaging* **38**:774–  
26 785. doi:10.1002/jmri.24047
- 27 Del Corso L, Moruzzo D, Conte B, Agelli M, Romanelli AM, Pastine F, Protti M, Pentimone F,  
28 Baggiani G. 1998. Tortuosity, kinking, and coiling of the carotid artery: Expression of  
29 atherosclerosis or aging? *Angiology* **49**:361–371. doi:10.1177/000331979804900505
- 30 Desikan RS, Ségonne F, Fischl B, Quinn BT, Dickerson BC, Blacker D, Buckner RL, Dale AM,  
31 Maguire RP, Hyman BT, Albert MS, Killiany RJ. 2006. An automated labeling system for  
32 subdividing the human cerebral cortex on MRI scans into gyral based regions of interest.  
33 *NeuroImage* **31**:968–980. doi:10.1016/j.neuroimage.2006.01.021
- 34 Dinov ID, Van Horn JD, Lozev KM, Magsipoc R, Petrosyan P, Liu Z, MacKenzie-Graham A,  
35 Eggert P, Parker DS, Toga AW. 2009. Efficient, distributed and interactive neuroimaging  
36 data analysis using the LONI pipeline. *Frontiers in neuroinformatics* **3**.
- 37 Donahue EK, Murdos A, Jakowec MW, Sheikh-Bahaei N, Toga AW, Petzinger GM, Sepelband  
38 F. 2021. Global and Regional Changes in Perivascular Space in Idiopathic and Familial  
39 Parkinson’s Disease. *Movement Disorders* 1–12. doi:10.1002/mds.28473

- 1 Doubal FN, MacLulich AMJ, Ferguson KJ, Dennis MS, Wardlaw JM. 2010. Enlarged  
2 Perivascular Spaces on MRI Are a Feature of Cerebral Small Vessel Disease. *Stroke*  
3 **41**:450–454. doi:10.1161/STROKEAHA.109.564914
- 4 Farrall AJ, Wardlaw JM. 2009. Blood-brain barrier: Ageing and microvascular disease -  
5 systematic review and meta-analysis. *Neurobiology of Aging*.  
6 doi:10.1016/j.neurobiolaging.2007.07.015
- 7 Fischl B, Salat DH, Busa E, Albert M, Dieterich M, Haselgrove C, Van Der Kouwe A, Killiany R,  
8 Kennedy D, Klaveness S. 2002. Whole brain segmentation: automated labeling of  
9 neuroanatomical structures in the human brain. *Neuron* **33**:341–355.
- 10 Fischl B, Salat DH, van der Kouwe AJW, Makris N, Ségonne F, Quinn BT, Dale AM. 2004.  
11 Sequence-independent segmentation of magnetic resonance images. *NeuroImage*  
12 **23**:S69–S84. doi:DOI: 10.1016/j.neuroimage.2004.07.016
- 13 Fleischman D, Berdahl JP, Zaydlarova J, Stinnett S, Fautsch MP, Allingham RR. 2012.  
14 Cerebrospinal Fluid Pressure Decreases with Older Age. *PLoS ONE* **7**:1–9.  
15 doi:10.1371/journal.pone.0052664
- 16 Fortin JP, Cullen N, Sheline YI, Taylor WD, Aselcioglu I, Cook PA, Adams P, Cooper C, Fava  
17 M, McGrath PJ, McInnis M, Phillips ML, Trivedi MH, Weissman MM, Shinohara RT. 2018.  
18 Harmonization of cortical thickness measurements across scanners and sites. *NeuroImage*  
19 **167**:104–120. doi:10.1016/j.neuroimage.2017.11.024
- 20 Francis F, Ballerini L, Wardlaw JM. 2019. Perivascular spaces and their associations with risk  
21 factors, clinical disorders and neuroimaging features: A systematic review and meta-  
22 analysis. *International Journal of Stroke* **14**:359–371. doi:10.1177/1747493019830321
- 23 Frangi AF, Niessen WJ, Vincken KL, Viergever MA. 1998. Multiscale vessel enhancement  
24 filteringInternational Conference on Medical Image Computing and Computer-Assisted  
25 Intervention. Springer. pp. 130–137. doi:10.1007/BFb0056195
- 26 Glasser MF, Sotiropoulos SN, Wilson JA, Coalson TS, Fischl B, Andersson JL, Xu J, Jbabdi S,  
27 Webster M, Polimeni JR, Van Essen DC, Jenkinson M. 2013. The minimal preprocessing  
28 pipelines for the Human Connectome Project. *NeuroImage* **80**:105–124.  
29 doi:10.1016/j.neuroimage.2013.04.127
- 30 Gonzales RJ, Duckles SP, Krause DN. 2009. Dihydrotestosterone stimulates cerebrovascular  
31 inflammation through NFκB, modulating contractile function. *Journal of Cerebral Blood*  
32 *Flow and Metabolism* **29**:244–253. doi:10.1038/jcbfm.2008.115
- 33 Gonzales RJ, Krause DN, Duckles SP. 2004. Testosterone suppresses endothelium-dependent  
34 dilation of rat middle cerebral arteries. *American Journal of Physiology - Heart and*  
35 *Circulatory Physiology* **286**:552–560. doi:10.1152/ajpheart.00663.2003
- 36 Greve DN, Fischl B. 2009. Accurate and robust brain image alignment using boundary-based  
37 registration. *NeuroImage* **48**:63–72. doi:10.1016/j.neuroimage.2009.06.060
- 38 Groeschel S, Chong WK, Surtees R, Hanefeld F. 2006. Virchow-Robin spaces on magnetic  
39 resonance images: normative data, their dilatation, and a review of the literature.  
40 *Neuroradiology* **48**:745–754.

- 1 Gutierrez J, Rundek T, Ekind MSV, Sacco RL, Wright CB. 2013. Perivascular spaces are  
2 associated with atherosclerosis: An insight from the northern manhattan study. *American*  
3 *Journal of Neuroradiology* **34**:1711–1716. doi:10.3174/ajnr.A3498
- 4 Harms M, Somerville L, Ances B, Andersson J, Barch D, Bastiani M, Bookheimer S, Brown T,  
5 Buckner R, Burgess G, Coalson T, Chappell M, Dapretto M, Douaud G, Fischl B, Glasser  
6 M, Greve D, Hodge C, Jamison K, Jbabdi S, Kandala S, Li X, Mair R, Mangia S, Marcus D,  
7 Mascali D, Moeller S, Nichols T, Robinson E, Salat D, Smith S, Sotiropoulos S, Terpstra M,  
8 Thomas K, Tisdall M, Ugurbil K, van der Kouwe A, Woods R, Zollei L, Van Essen D,  
9 Yacoub E. 2018. Extending the Human Connectome Project across ages: Imaging  
10 protocols for the Lifespan Development and Aging projects. *Neuroimage* **183**:972–984.
- 11 Hauer AJ, Ruigrok YM, Algra A, van Dijk EJ, Koudstaal PJ, Luijckx GJ, Nederkoorn PJ, van  
12 Oostenbrugge RJ, Visser MC, Wermer MJ, Jaap Kappelle L, Klijn CJM. 2017. Age-specific  
13 vascular risk factor profiles according to stroke subtype. *J Am Heart Assoc* **6**.  
14 doi:10.1161/JAHA.116.005090
- 15 Hou Y, Dan X, Babbar M, Wei Y, Hasselbalch SG, Croteau DL, Bohr VA. 2019. Ageing as a risk  
16 factor for neurodegenerative disease. *Nature Reviews Neurology* **15**:565–581.  
17 doi:10.1038/s41582-019-0244-7
- 18 Huang P, Zhu Z, Zhang R, Wu X, Jiaerken Y, Wang S, Yu W, Hong H, Lian C, Li K, Zeng Q,  
19 Luo X, Xu X, Yu X, Yang Y, Zhang M. 2021. Factors Associated With the Dilation of  
20 Perivascular Space in Healthy Elderly Subjects. *Frontiers in Aging Neuroscience* **13**:1–9.  
21 doi:10.3389/fnagi.2021.624732
- 22 Iliff JJ, Wang M, Liao Y, Plogg BA, Peng W, Gundersen GA, Benveniste H, Vates GE, Deane R,  
23 Goldman SA, Nagelhus EA, Nedergaard M. 2012. A paravascular pathway facilitates CSF  
24 flow through the brain parenchyma and the clearance of interstitial solutes, including amyloid  
25 beta. *Science Translational Medicine* **4**. doi:10.1126/scitranslmed.3003748
- 26 Iliff JJ, Wang M, Zeppenfeld DM, Venkataraman A, Plog BA, Liao Y, Deane R, Nedergaard M.  
27 2013. Cerebral arterial pulsation drives paravascular CSF–interstitial fluid exchange in the  
28 murine brain. *Journal of Neuroscience* **33**:18190–18199.
- 29 Jessen NA, Munk ASF, Lundgaard I, Nedergaard M. 2015. The Glymphatic System – A  
30 Beginner’s Guide. *Neurochem Res* **40**:2583–2599. doi:10.1016/j.physbeh.2017.03.040
- 31 Keable A, Fenna K, Yuen HM, Johnston DA, Smyth NR, Smith C, Salman RAS, Samarasekera  
32 N, Nicoll JAR, Attems J, Kalaria RN, Weller RO, Carare RO. 2016. Deposition of amyloid  $\beta$   
33 in the walls of human leptomeningeal arteries in relation to perivascular drainage pathways  
34 in cerebral amyloid angiopathy. *Biochimica et Biophysica Acta - Molecular Basis of*  
35 *Disease* **1862**:1037–1046. doi:10.1016/j.bbadis.2015.08.024
- 36 Kim DE, Park JH, Schellingerhout D, Ryu WS, Lee SK, Jang MU, Jeong SW, Na JY, Park JE,  
37 Lee EJ, Cho KH, Kim JT, Kim BJ, Han MK, Lee Jun, Cha JK, Kim DH, Lee SJ, Ko Y, Lee  
38 BC, Yu KH, Oh MS, Hong KS, Cho YJ, Park JM, Kang K, Park TH, Lee KB, Park KJ, Choi  
39 HK, Lee Juneyoung, Bae HJ. 2019. Mapping the Supratentorial Cerebral Arterial Territories  
40 Using 1160 Large Artery Infarcts. *JAMA Neurology* **76**:72–80.  
41 doi:10.1001/jamaneurol.2018.2808
- 42 Kress BT, Iliff JJ, Xia M, Wang M, Wei Bs HS, Zeppenfeld D, Xie L, Hongyi Kang BS, Xu Q,  
43 Liew JA, Plog BA, Ding F, PhD RD, Nedergaard M. 2014. Impairment of paravascular

- 1 clearance pathways in the aging brain. *Annals of Neurology* **76**:845–861.  
2 doi:10.1002/ana.24271
- 3 Laveskog A, Wang R, Bronge L, Wahlund L-O, Qiu C. 2018. Perivascular Spaces in Old Age:  
4 Assessment, Distribution, and Correlation with White Matter Hyperintensities. *American*  
5 *Journal of Neuroradiology* **39**:70 LP – 76.
- 6 Laveskog A., Wang R, Bronge L, Wahlund LO, Qiu C. 2018. Perivascular spaces in old age:  
7 Assessment, distribution, and correlation with white matter hyperintensities. *American*  
8 *Journal of Neuroradiology* **39**:70–76. doi:10.3174/ajnr.A5455
- 9 Liu F, Yuan R, Benashski SE, McCullough LD. 2009. Changes in experimental stroke outcome  
10 across the life span. *Journal of Cerebral Blood Flow and Metabolism* **29**:792–802.  
11 doi:10.1038/jcbfm.2009.5
- 12 Manjón J V, Coupé P, Martí-Bonmatí L, Collins DL, Robles M. 2010. Adaptive non-local means  
13 denoising of MR images with spatially varying noise levels. *Journal of Magnetic Resonance*  
14 *Imaging* **31**:192–203.
- 15 Marinković S, Gibo H, Milisavljević M, Četković M. 2001. Anatomic and clinical correlations of  
16 the lenticulostriate arteries. *Clinical Anatomy* **14**:190–195. doi:10.1002/ca.1032
- 17 Martinez-Ramirez S, Pontes-Neto OM, Dumas AP, Auriel E, Halpin A, Quimby M, Gurol ME,  
18 Greenberg SM, Viswanathan A. 2013. Topography of dilated perivascular spaces in  
19 subjects from a memory clinic cohort. *Neurology* **80**:1551–1556.  
20 doi:10.1212/WNL.0b013e31828f1876
- 21 Mestre H, Kostrikov S, Mehta RI, Nedergaard M. 2017. Perivascular spaces, glymphatic  
22 dysfunction, and small vessel disease. *Clinical Science* **131**:2257–2274.  
23 doi:10.1042/CS20160381
- 24 Murata T, Dietrich HH, Xiang C, Dacey RG. 2013. G protein-coupled estrogen receptor agonist  
25 improves cerebral microvascular function after hypoxia/reoxygenation injury in male and  
26 female rats. *Stroke* **44**:779–785. doi:10.1161/STROKEAHA.112.678177
- 27 Ng YS, Stein J, Ning MM, Black-Schaffer RM. 2007. Comparison of clinical characteristics and  
28 functional outcomes of ischemic stroke in different vascular territories. *Stroke* **38**:2309–  
29 2314. doi:10.1161/STROKEAHA.106.475483
- 30 Obesity: preventing and managing the global epidemic. Report of a WHO consultation. 2000. .  
31 *World Health Organ Tech Rep Ser* **894**:i–xii, 1–253.
- 32 Opel RA, Christy A, Boespflug EL, Weymann KB, Case B, Pollock JM, Silbert LC, Lim MM.  
33 2018. Effects of traumatic brain injury on sleep and enlarged perivascular spaces. *Journal*  
34 *of Cerebral Blood Flow and Metabolism*. doi:10.1177/0271678X18791632
- 35 Pesce C, Carli F. 1988. Allometry of the perivascular spaces of the putamen in aging. *Acta*  
36 *Neuropathologica* **76**:292–294. doi:10.1007/BF00687778
- 37 Piantino J, Boespflug EL, Schwartz DL, Luther M, Morales AM, Lin A, Fossen R V., Silbert L,  
38 Nagel BJ. 2020. Characterization of MR imaging-visible perivascular spaces in the white  
39 matter of healthy adolescents at 3T. *American Journal of Neuroradiology* **41**:2139–2145.  
40 doi:10.3174/ajnr.A6789

- 1 Pomponio R, Erus G, Habes M, Doshi J, Srinivasan D, Mamourian E, Bashyam V, Nasrallah IM,  
2 Satterthwaite TD, Fan Y, Launer LJ, Masters CL, Maruff P, Zhuo C, Völzke H, Johnson SC,  
3 Fripp J, Koutsouleris N, Wolf DH, Gur Raquel, Gur Ruben, Morris J, Albert MS, Grabe HJ,  
4 Resnick SM, Bryan RN, Wolk DA, Shinohara RT, Shou H, Davatzikos C. 2020.  
5 Harmonization of large MRI datasets for the analysis of brain imaging patterns throughout  
6 the lifespan. *NeuroImage* **208**. doi:10.1016/j.neuroimage.2019.116450
- 7 Potter GM, Doubal FN, Jackson CA, Chappell FM, Sudlow CL, Dennis MS, Wardlaw JM. 2015.  
8 Enlarged perivascular spaces and cerebral small vessel disease. *International Journal of*  
9 *Stroke* **10**:376–381. doi:10.1111/ijis.12054
- 10 Prins ND, Scheltens P. 2015. White matter hyperintensities, cognitive impairment and dementia:  
11 An update. *Nature Reviews Neurology* **11**:157–165. doi:10.1038/nrneurol.2015.10
- 12 Ramirez J, Berezuk C, McNeely AA, Scott CJM, Gao F, Black SE. 2015. Visible Virchow-Robin  
13 spaces on magnetic resonance imaging of Alzheimer's disease patients and normal elderly  
14 from the Sunnybrook dementia study. *Journal of Alzheimer's Disease* **43**:415–424.  
15 doi:10.3233/JAD-132528
- 16 Razmara A, Sunday L, Stirone C, Xiao BW, Krause DN, Duckles SP, Procaccio V. 2008.  
17 Mitochondrial effects of estrogen are mediated by estrogen receptor  $\alpha$  in brain endothelial  
18 cells. *Journal of Pharmacology and Experimental Therapeutics* **325**:782–790.  
19 doi:10.1124/jpet.107.134072
- 20 Reuter M, Rosas HD, Fischl B. 2010. Highly Accurate Inverse Consistent Registration: A Robust  
21 Approach. *NeuroImage* **53**:1181–1196. doi:10.1016/j.neuroimage.2010.07.020
- 22 Rollins NK, Deline C, Morriss MC. 1993. Prevalence and clinical significance of dilated Virchow-  
23 Robin spaces in childhood. *Radiology* **189**:53–57.
- 24 Schnerr RS, Jansen JFA, Uludag K, Hofman PAM, Wildberger JE, van Oostenbrugge RJ,  
25 Backes WH. 2017. Pulsatility of lenticulostriate arteries assessed by 7 Tesla flow MRI-  
26 Measurement, reproducibility, and applicability to aging effect. *Frontiers in Physiology* **8**:1–  
27 10. doi:10.3389/fphys.2017.00961
- 28 Segonne F, Dale AM, Busa E, Glessner M, Salat D, Hahn HK, Fischl B. 2004. A hybrid  
29 approach to the skull stripping problem in MRI. *NeuroImage* **22**:1060–1075. doi:DOI:  
30 10.1016/j.neuroimage.2004.03.032
- 31 Seppehrband F, Barisano G, Sheikh-Bahaei N, Cabeen RP, Choupan J, Law M, Toga AW. 2019.  
32 Image processing approaches to enhance perivascular space visibility and quantification  
33 using MRI. *Sci Rep* **9**:12351. doi:https://doi.org/10.1038/s41598-019-48910-x
- 34 Seppehrband F, Barisano G, Sheikh-Bahaei N, Choupan J, Cabeen RP, Lynch KM, Crawford  
35 MS, Lan H, Mack WJ, Chui HC, Ringman JM, Toga AW. 2021. Volumetric distribution of  
36 perivascular space in relation to mild cognitive impairment. *Neurobiology of Aging* **99**:28–  
37 43. doi:10.1016/j.neurobiolaging.2020.12.010
- 38 Sled JG, Zijdenbos AP, Evans AC. 1998. A nonparametric method for automatic correction of  
39 intensity nonuniformity in MRI data. *IEEE Transactions on Medical Imaging* **17**:87–97.  
40 doi:10.1109/42.668698



- 1 Somerville LH, Bookheimer SY, Buckner RL, Burgess GC, Curtiss SW, Dapretto M, Elam JS,  
2 Gaffrey MS, Harms MP, Hodge C, Kandala S, Kastman EK, Nichols TE, Schlaggar BL,  
3 Smith SM, Thomas KM, Yacoub E, Van Essen DC, Barch DM. 2018. The Lifespan Human  
4 Connectome Project in Development: A large-scale study of brain connectivity  
5 development in 5–21 year olds. *NeuroImage* **183**:456–468.  
6 doi:10.1016/j.neuroimage.2018.08.050
- 7 Sunday L, Tran MM, Krause DN, Duckles SP. 2006. Estrogen and progestagens differentially  
8 modulate vascular proinflammatory factors. *American Journal of Physiology -*  
9 *Endocrinology and Metabolism* **291**:261–267. doi:10.1152/ajpendo.00550.2005
- 10 Sweeney MD, Kisler K, Montagne A, Toga AW, Zlokovic B v. 2018. The role of brain  
11 vasculature in neurodegenerative disorders. *Nature Neuroscience* **21**:1318–1331.  
12 doi:10.1038/s41593-018-0234-x
- 13 Troili F, Cipollini V, Moci M, Morena E, Palotai M, Rinaldi V, Romano C, Ristori G, Giubilei F,  
14 Salvetti M, Orzi F, Guttman CRG, Cavallari M. 2020. Perivascular Unit: This Must Be the  
15 Place. The Anatomical Crossroad Between the Immune, Vascular and Nervous System.  
16 *Frontiers in Neuroanatomy* **14**:1–17. doi:10.3389/fnana.2020.00017
- 17 Van Essen DC, Smith SM, Barch DM, Behrens TEJ, Yacoub E, Ugurbil K. 2013. The WU-Minn  
18 Human Connectome Project: An overview. *NeuroImage* **80**:62–79.  
19 doi:10.1016/j.neuroimage.2013.05.041
- 20 Wardlaw JM, Benveniste H, Nedergaard M, Zlokovic B v., Mestre H, Lee H, Doubal FN, Brown  
21 R, Ramirez J, MacIntosh BJ, Tannenbaum A, Ballerini L, Rungta RL, Boido D, Sweeney M,  
22 Montagne A, Charpak S, Joutel A, Smith KJ, Black SE. 2020. Perivascular spaces in the  
23 brain: anatomy, physiology and pathology. *Nature Reviews Neurology* **16**:137–153.  
24 doi:10.1038/s41582-020-0312-z
- 25 Wardlaw JM, Smith EE, Biessels GJ, Cordonnier C, Fazekas F, Frayne R, Lindley RI, O'Brien  
26 JT, Barkhof F, Benavente OR, Black SE, Brayne C, Breteler M, Chabriat H, DeCarli C, de  
27 Leeuw FE, Doubal F, Duering M, Fox NC, Greenberg S, Hachinski V, Kilimann I, Mok V,  
28 Oostenbrugge R van, Pantoni L, Speck O, Stephan BCM, Teipel S, Viswanathan A,  
29 Werring D, Chen C, Smith C, van Buchem M, Norrving B, Gorelick PB, Dichgans M. 2013.  
30 Neuroimaging standards for research into small vessel disease and its contribution to  
31 ageing and neurodegeneration. *The Lancet Neurology* **12**:822–838. doi:10.1016/S1474-  
32 4422(13)70124-8
- 33 Wardlaw JM, Valdés Hernández MC, Muñoz-Maniega S. 2015. What are white matter  
34 hyperintensities made of? Relevance to vascular cognitive impairment. *Journal of the*  
35 *American Heart Association* **4**:001140. doi:10.1161/JAHA.114.001140
- 36 Westrate LM, Drocco JA, Martin KR, Hlavacek WS, MacKeigan JP. 2014. Mitochondrial  
37 morphological features are associated with fission and fusion events. *PLoS ONE* **9**.  
38 doi:10.1371/journal.pone.0095265
- 39 Whelton PK, Carey RM, Aronow WS, Casey DE, Collins KJ, Dennison Himmelfarb C, DePalma  
40 SM, Gidding S, Jamerson KA, Jones DW, MacLaughlin EJ, Muntner P, Ovbiagele B, Smith  
41 SC, Spencer CC, Stafford RS, Taler SJ, Thomas RJ, Williams KA, Williamson JD, Wright  
42 JT. 2018. 2017 ACC/AHA/AAPA/ABC/ACPM/AGS/APhA/ASH/ASPC/NMA/PCNA  
43 Guideline for the Prevention, Detection, Evaluation, and Management of High Blood  
44 Pressure in Adults: Executive Summary: A Report of the American College of

- 1           Cardiology/American Heart Association Task Force on Clinical Practice Guidelines.  
2           *Hypertension* **71**:1269–1324. doi:10.1161/HYP.0000000000000066
- 3           Wildman RP, Colvin AB, Powell LH, Matthews KA, Everson-Rose SA, Hollenberg S, Johnston  
4           JM, Sutton-Tyrrell K. 2008. Associations of endogenous sex hormones with the vasculature  
5           in menopausal women: The Study of Women’s Health Across the Nation (SWAN).  
6           *Menopause* **15**:414–421. doi:10.1097/gme.0b013e318154b6f5
- 7           Xue Y, Liu N, Zhang M, Ren X, Tang J, Fu J. 2020. Concomitant enlargement of perivascular  
8           spaces and decrease in glymphatic transport in an animal model of cerebral small vessel  
9           disease. *Brain Research Bulletin* **161**:78–83. doi:10.1016/j.brainresbull.2020.04.008
- 10          Yakushiji Y, Charidimou A, Hara M, Noguchi T, Nishihara M, Eriguchi M, Nanri Y, Nishiyama M,  
11          Werring DJ, Hara H. 2014. Topography and associations of perivascular spaces in healthy  
12          adults; The kashima scan study. *Neurology* **83**:2116–2123.  
13          doi:10.1212/WNL.0000000000001054
- 14          Zaidat OO, Castonguay AC, Teleb MS, Asif K, Gheith A, Southwood C, Pollock G, Lynch JR.  
15          2014. Middle Cerebral Artery Aneurysm Endovascular and Surgical Therapies:  
16          Comprehensive Literature Review and Local Experience. *Neurosurgery Clinics of North*  
17          *America* **25**:455–469.
- 18          Zhu YC, Dufouil C, Mazoyer B, Soumaré A, Ricolfi F, Tzourio C, Chabriat H. 2011. Frequency  
19          and location of dilated Virchow-Robin spaces in elderly people: A population-based 3D MR  
20          imaging study. *American Journal of Neuroradiology* **32**:709–713. doi:10.3174/ajnr.A2366
- 21          Zhu YC, Tzourio C, Soumaré A, Mazoyer B, Dufouil C, Chabriat H. 2010. Severity of dilated  
22          virchow-robin spaces is associated with age, blood pressure, and MRI markers of small  
23          vessel disease: A population-based study. *Stroke* **41**:2483–2490.  
24          doi:10.1161/STROKEAHA.110.591586
- 25          Zhuang FJ, Chen Y, He WB, Cai ZY. 2018. Prevalence of white matter hyperintensities  
26          increases with age. *Neural Regeneration Research* **13**:2141–2146. doi:10.4103/1673-  
27          5374.241465
- 28          Zieman SJ, Melenovsky V, Kass DA. 2005. Mechanisms, pathophysiology, and therapy of  
29          arterial stiffness. *Arteriosclerosis, Thrombosis, and Vascular Biology* **25**:932–943.  
30          doi:10.1161/01.ATV.0000160548.78317.29
- 31          Zong X, Lian C, Jimenez J, Yamashita K, Shen D, Lin W. 2020. Morphology of perivascular  
32          spaces and enclosed blood vessels in young to middle-aged healthy adults at 7T:  
33          Dependences on age, brain region, and breathing gas. *Neuroimage* **218**:116978.  
34          doi:10.1016/j.neuroimage.2020.116978
- 35          Zuloaga KL, O’Connor DT, Handa RJ, Gonzales RJ. 2012a. Estrogen receptor beta dependent  
36          attenuation of cytokine-induced cyclooxygenase-2 by androgens in human brain vascular  
37          smooth muscle cells and rat mesenteric arteries. *Steroids* **77**:835–844.  
38          doi:10.1016/j.steroids.2012.04.013
- 39          Zuloaga KL, Swift SN, Gonzales RJ, Wu TJ, Handa RJ. 2012b. The androgen metabolite, 5 $\alpha$ -  
40          androstane-3 $\beta$ ,17 $\beta$ -diol, decreases cytokine-induced cyclooxygenase-2, vascular cell  
41          adhesion molecule-1 expression, and P-glycoprotein expression in male human brain  
42          microvascular endothelial cells. *Endocrinology* **153**:5949–5960. doi:10.1210/en.2012-1316

1

## 2 **Acknowledgments**

3 The image computing resources provided by the Laboratory of Neuro Imaging Resource (LONIR)  
4 at USC are supported in part by National Institutes of Health (NIH) National Institute of Biomedical  
5 Imaging and Bioengineering (NIBIB) grant P41EB015922. Author KML is supported by the  
6 National Institute on Aging (NIA) of the NIH Institutional Training Grant T32AG058507. The  
7 research reported in this publication was supported by the National Institute of Mental Health  
8 (NIMH) of the NIH under the award number RF1MH123223, the NIA of the NIH under the award  
9 number R01-AG070825, and the USC ADRC 1P30AG066530-01.

10

## 11 **Author Contributions**

12 Kirsten M. Lynch: Conceptualization, Methodology, Formal analysis, Writing – Original Draft,  
13 Writing – Review and Editing, Visualization; Farshid Sepehrband: Conceptualization,  
14 Methodology, Software, Writing – Review & Editing, Resources, Data Curation, Supervision;  
15 Arthur W. Toga: Resources, Writing – Review & Editing, Supervision, Funding acquisition; Jeiran  
16 Choupan: Resources, Data Curation, Software, Writing – Review & Editing, Supervision, Project  
17 administration, Funding acquisition

18

## 19 **Competing Interest Statement**

20 The perivascular space mapping technology is part of a pending patent owned by FS and JC,  
21 with no financial interest/conflict.

22

## 23 **Materials and Correspondence**

24 Correspondence and requests for materials should be addressed to KML or JC  
25 ([kirsten.lynch@loni.usc.edu](mailto:kirsten.lynch@loni.usc.edu), [choupan@usc.edu](mailto:choupan@usc.edu))

## Figures and Tables

**Table 1.** Age distribution of HCP cohorts stratified by sex.

| Dataset        | <i>n</i> | Age           |             | <i>t</i> -statistic |
|----------------|----------|---------------|-------------|---------------------|
|                |          | Mean (SD)     | Range       |                     |
| HCP-D          | 471      | 14.36 (3.77)  | 8.08-21.92  | --                  |
| <i>Males</i>   | 211      | 14.44 (3.57)  | 8.08-21.83  | 0.43                |
| <i>Females</i> | 260      | 14.29 (3.93)  | 8.17-21.92  |                     |
| HCP-YA         | 405      | 28.73 (3.78)  | 22-36       | --                  |
| <i>Males</i>   | 179      | 27.89 (3.64)  | 22-36       | -4.07***            |
| <i>Females</i> | 226      | 29.40 (3.78)  | 22-36       |                     |
| HCP-A          | 513      | 56.35 (13.65) | 36-89.75    | --                  |
| <i>Males</i>   | 215      | 56.69 (13.74) | 36.00-89.75 | 0.47                |
| <i>Females</i> | 298      | 56.11 (13.59) | 36.17-87.75 |                     |
| Combined       | 1389     | 34.17 (20.07) | 8.08-89.75  | --                  |
| <i>Males</i>   | 605      | 33.70 (20.16) | 8.08-89.75  | 0.78                |
| <i>Females</i> | 784      | 34.54 (20.00) | 8.08-87.75  |                     |

SD = standard deviation; \*\*\*  $p < .001$  \*\*  $p < .01$  \*  $p < .05$

**Table 2.** Association between PVS morphological features and age stratified by cohort

| Variable | Cohort | White matter           |                       |          | Basal ganglia          |                       |           |
|----------|--------|------------------------|-----------------------|----------|------------------------|-----------------------|-----------|
|          |        | <i>B</i>               | Std Error             | <i>t</i> | <i>B</i>               | Std Error             | <i>t</i>  |
| VF       | HCP-D  | $4.32 \times 10^{-4}$  | $3.65 \times 10^{-5}$ | 3.93***  | $2.11 \times 10^{-5}$  | $5.08 \times 10^{-5}$ | 0.41      |
|          | HCP-YA | $1.82 \times 10^{-4}$  | $4.85 \times 10^{-5}$ | 3.75**   | $4.45 \times 10^{-6}$  | $7.22 \times 10^{-5}$ | 0.06      |
|          | HCP-A  | $1.78 \times 10^{-4}$  | $1.26 \times 10^{-5}$ | 14.07*** | $3.63 \times 10^{-4}$  | $1.99 \times 10^{-5}$ | 18.29***  |
| Count    | HCP-D  | 32.58                  | 4.59                  | 7.09***  | -1.37                  | 0.75                  | -1.81     |
|          | HCP-YA | 15.19                  | 5.34                  | 2.85**   | 0.67                   | 0.73                  | 0.91      |
|          | HCP-A  | 1.18                   | 1.41                  | 0.84     | 0.95                   | 0.16                  | 5.78***   |
| Diameter | HCP-D  | $6.69 \times 10^{-4}$  | $3.97 \times 10^{-3}$ | 0.17     | $3.36 \times 10^{-3}$  | $1.95 \times 10^{-3}$ | 1.72      |
|          | HCP-YA | $1.52 \times 10^{-2}$  | $5.41 \times 10^{-3}$ | 2.81*    | $6.18 \times 10^{-3}$  | $3.22 \times 10^{-3}$ | 1.92      |
|          | HCP-A  | $1.18 \times 10^{-2}$  | $1.50 \times 10^{-3}$ | 7.88***  | $1.06 \times 10^{-2}$  | $8.81 \times 10^{-4}$ | 12.08***  |
| Solidity | HCP-D  | $-3.76 \times 10^{-4}$ | $3.33 \times 10^{-4}$ | -1.13    | $1.42 \times 10^{-4}$  | $3.40 \times 10^{-4}$ | 0.42      |
|          | HCP-YA | $-1.18 \times 10^{-3}$ | $3.66 \times 10^{-4}$ | -3.22**  | $9.59 \times 10^{-5}$  | $4.15 \times 10^{-4}$ | 0.23      |
|          | HCP-A  | $-3.68 \times 10^{-4}$ | $9.02 \times 10^{-5}$ | -4.08*** | $-1.02 \times 10^{-3}$ | $9.55 \times 10^{-5}$ | -10.70*** |

The partial correlation coefficients for the influence of age on PVS morphological features after controlling for sex and scanner type for the white matter and BG stratified by cohort. Age-related changes to white matter PVS morphology were observed in all cohorts, while BG PVS morphological changes with age were only observed in the aging cohort. \*\*\*  $p < .001$  \*\*  $p < .01$  \*  $p < .05$

**Table 3.** Quadratic model coefficients that relate PVS morphological features with age across the lifespan in white matter and basal ganglia

| Coefficient |                  | White matter             |                         |           |                       | Basal ganglia            |                         |          |                       |
|-------------|------------------|--------------------------|-------------------------|-----------|-----------------------|--------------------------|-------------------------|----------|-----------------------|
|             |                  | <i>B</i>                 | Std Error               | <i>t</i>  | <i>R</i> <sup>2</sup> | <i>B</i>                 | Std Error               | <i>t</i> | <i>R</i> <sup>2</sup> |
| VF          | Age              | 1.96 x 10 <sup>-4</sup>  | 4.78 x 10 <sup>-6</sup> | 40.93***  | 0.55                  | -1.08 x 10 <sup>-4</sup> | 3.40 x 10 <sup>-5</sup> | -3.18**  | 0.37                  |
|             | Age <sup>2</sup> | --                       | --                      | --        |                       | 3.90 x 10 <sup>-6</sup>  | 3.97 x 10 <sup>-7</sup> | 9.83***  |                       |
| Count       | Age              | 39.26                    | 2.45                    | 16.03***  | 0.30                  | -2.37                    | 0.36                    | -6.55*** | 0.03                  |
|             | Age <sup>2</sup> | -0.32                    | 0.03                    | -11.27*** |                       | 2.94 x 10 <sup>-2</sup>  | 4.23 x 10 <sup>-3</sup> | 6.95***  |                       |
| Diameter    | Age              | 1.09 x 10 <sup>-2</sup>  | 5.40 x 10 <sup>-4</sup> | 20.18***  | 0.23                  | 2.04 x 10 <sup>-3</sup>  | 1.35 x 10 <sup>-3</sup> | 1.51     | 0.29                  |
|             | Age <sup>2</sup> | --                       | --                      | --        |                       | 6.46 x 10 <sup>-5</sup>  | 1.58 x 10 <sup>-5</sup> | 4.09***  |                       |
| Solidity    | Age              | -1.27 x 10 <sup>-3</sup> | 1.59 x 10 <sup>-4</sup> | -7.96***  | 0.20                  | 1.87 x 10 <sup>-4</sup>  | 1.79 x 10 <sup>-4</sup> | 1.05     | 0.14                  |
|             | Age <sup>2</sup> | 7.05 x 10 <sup>-6</sup>  | 1.86 x 10 <sup>-6</sup> | 3.79***   |                       | -9.56 x 10 <sup>-6</sup> | 2.09 x 10 <sup>-6</sup> | -4.57*** |                       |

Quadratic regression fits for the PVS morphological features in subcortical white matter and basal ganglia. The quadratic model did not provide the best fit for the white matter PVS VF and mean diameter and age-related variance was better explained by a linear regression. \*\*\* p<.001 \*\* p<.01

\* p<.05

**Table 4.** Sex differences in PVS morphological features stratified by HCP cohort

| Feature          | Cohort | White matter |                                                    |                                                    | BG       |                                                    |                                                    |
|------------------|--------|--------------|----------------------------------------------------|----------------------------------------------------|----------|----------------------------------------------------|----------------------------------------------------|
|                  |        | <i>t</i>     | Females                                            | Males                                              | <i>t</i> | Females                                            | Males                                              |
|                  |        |              | Mean (SD)                                          | Mean (SD)                                          |          | Mean (SD)                                          | Mean (SD)                                          |
| VF               | HCPD   | 6.67***      | 6.25 x 10 <sup>-3</sup> (2.87 x 10 <sup>-3</sup> ) | 8.16 x 10 <sup>-3</sup> (3.29 x 10 <sup>-3</sup> ) | 6.33***  | 1.05 x 10 <sup>-2</sup> (4.89 x 10 <sup>-3</sup> ) | 1.34 x 10 <sup>-2</sup> (5.14 x 10 <sup>-3</sup> ) |
|                  | HCPYA  | 2.98**       | 9.68 x 10 <sup>-3</sup> (3.51 x 10 <sup>-3</sup> ) | 1.05 x 10 <sup>-2</sup> (3.87 x 10 <sup>-3</sup> ) | -1.08    | 1.57 x 10 <sup>-2</sup> (4.56 x 10 <sup>-3</sup> ) | 1.51 x 10 <sup>-2</sup> (5.43 x 10 <sup>-3</sup> ) |
|                  | HCPA   | 0.08         | 1.55 x 10 <sup>-2</sup> (4.66 x 10 <sup>-3</sup> ) | 1.57 x 10 <sup>-2</sup> (4.42 x 10 <sup>-3</sup> ) | 7.08***  | 1.74 x 10 <sup>-2</sup> (8.03 x 10 <sup>-3</sup> ) | 2.24 x 10 <sup>-2</sup> (9.47 x 10 <sup>-3</sup> ) |
| Count            | HCPD   | 2.06*        | 1101 (404)                                         | 1374 (441)                                         | 4.16***  | 181 (69)                                           | 245 (68)                                           |
|                  | HCPYA  | -1.37        | 1489 (431)                                         | 1411 (382)                                         | -1.06    | 209 (43)                                           | 227 (64)                                           |
|                  | HCPA   | 1.67         | 1713 (396)                                         | 2045 (480)                                         | 5.51***  | 177 (50)                                           | 235 (62)                                           |
| Diameter<br>(mm) | HCPD   | 3.68***      | 1.79 (0.39)                                        | 1.93 (0.42)                                        | 0.69     | 1.31 (0.23)                                        | 1.33 (0.23)                                        |
|                  | HCPYA  | 3.31**       | 1.92 (0.38)                                        | 2.04 (0.43)                                        | -0.63    | 1.45 (0.24)                                        | 1.43 (0.22)                                        |
|                  | HCPA   | -1.96        | 2.39 (0.45)                                        | 2.33 (0.41)                                        | 3.20**   | 1.64 (0.28)                                        | 1.71 (0.29)                                        |
| Solidity         | HCPD   | -4.43***     | 0.61 (0.03)                                        | 0.60 (0.03)                                        | -4.54*** | 0.58 (0.03)                                        | 0.57 (0.03)                                        |
|                  | HCPYA  | 1.23         | 0.59 (0.03)                                        | 0.59 (0.03)                                        | -2.59**  | 0.56 (0.03)                                        | 0.56 (0.03)                                        |
|                  | HCPA   | -3.17**      | 0.57 (0.03)                                        | 0.57 (0.03)                                        | -6.32*** | 0.56 (0.03)                                        | 0.54 (0.04)                                        |

Main effect of sex on PVS morphological features in subcortical white matter and BG per HCP cohort after controlling for the effects of sex. PVS count is additionally normalized by intra-cranial volume.

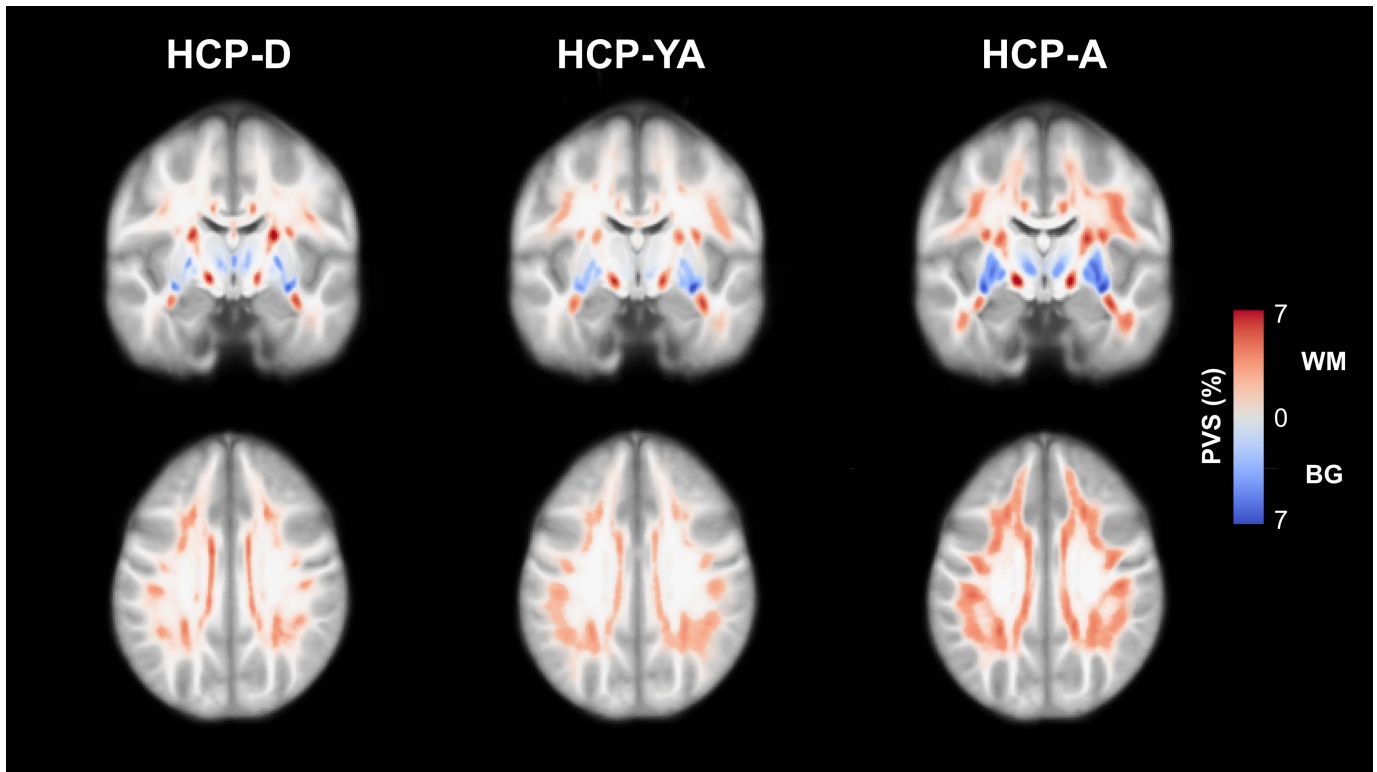

**Fig. 1.** Maps of the PVS distribution in the HCP-D (n=471), HCP-YA (n=405) and HCP-A (n=516) cohorts. Normative PVS maps were generated by registering each subject map to a population-averaged template and then averaging PVS segmentations across each group. The results are presented as the percentage of overlapping PVS across each group within the subcortical white matter (red) and basal ganglia (blue). PVS is prevalent in all HCP cohorts, including children and adolescents, and the apparent PVS burden increases with age in both the white matter and basal ganglia.



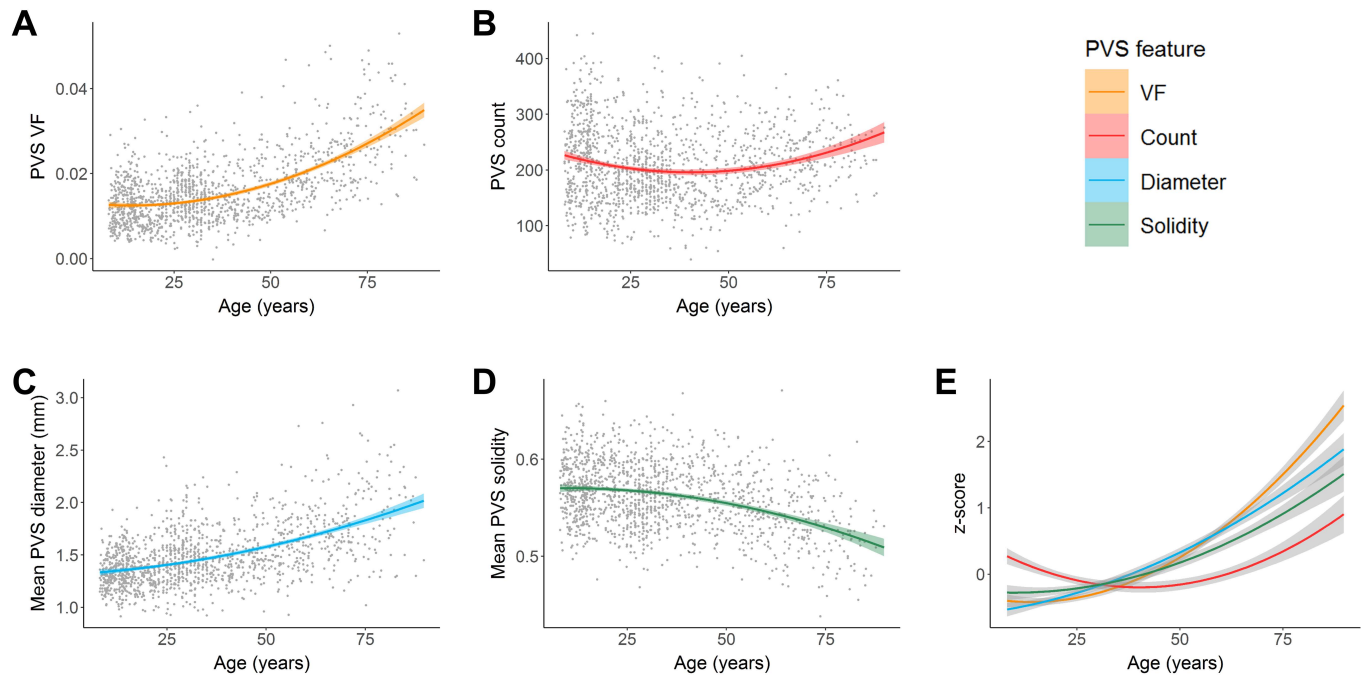

**Fig. 2.** Associations between PVS morphology and age in the basal ganglia. A quadratic curve provided the best fit model to describe the relationship between age and (A) PVS volume fraction, (B) count, (C) mean diameter and (D) mean solidity. (E) PVS features in the BG were standardized (z-scores) and plotted on the same normalized y-axis to enable comparison of feature differences with age over the lifespan (x-axis). The mean PVS solidity curve was also inverted to show similarities and differences more easily. Within the BG, PVS volume fraction and mean PVS diameter undergo similar age-related trajectories, while mean PVS solidity and PVS count grow more slowly.

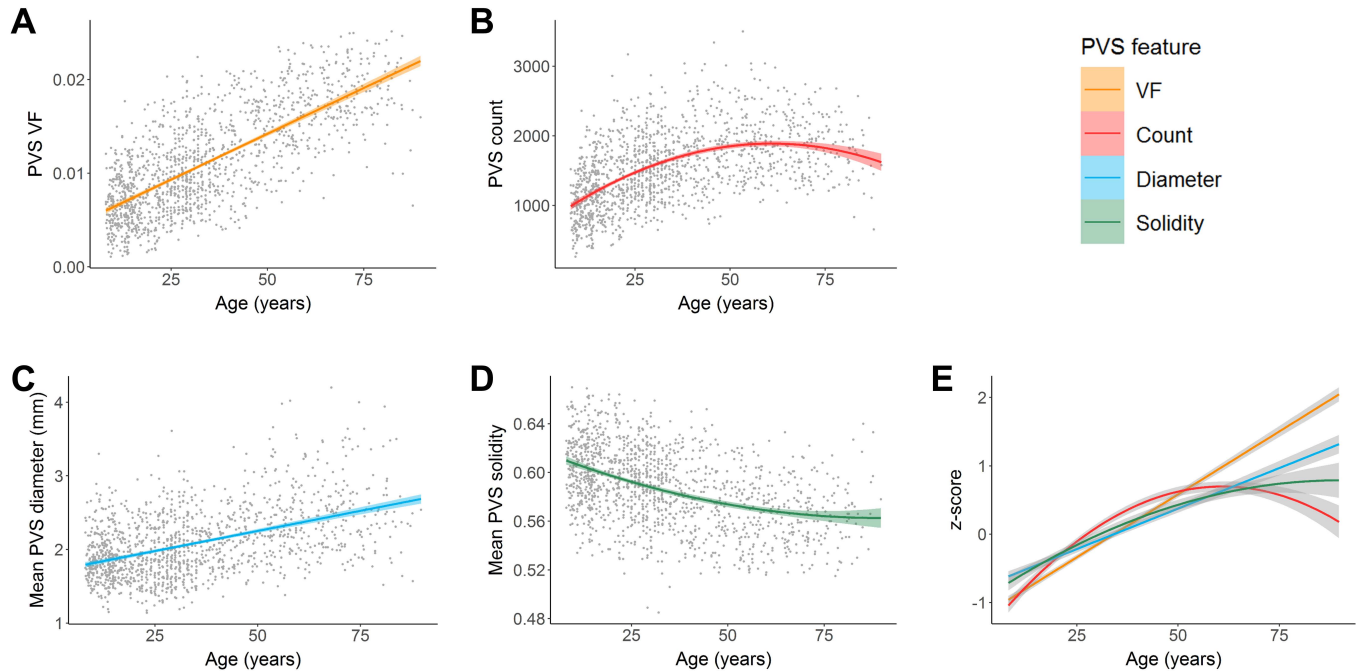

**Fig. 3.** Associations between PVS morphology and age in the subcortical white matter. Age was positively associated with (A) PVS volume fraction, (B) count and (C) mean diameter and negatively associated with (D) mean solidity. Age-related changes to the PVS volume fraction and mean diameter were best explained with a linear model, while age-related changes to the PVS count and mean solidity were best represented with a quadratic model. (E) PVS features in the subcortical white matter were standardized (z-scores) and plotted on the same normalized y-axis to enable comparison of feature differences with age over the lifespan (x-axis). The mean PVS solidity curve was also inverted to show similarities and differences more easily. Within the white matter, PVS count, mean PVS diameter and mean PVS solidity undergo slower age-related changes compared to PVS VF.

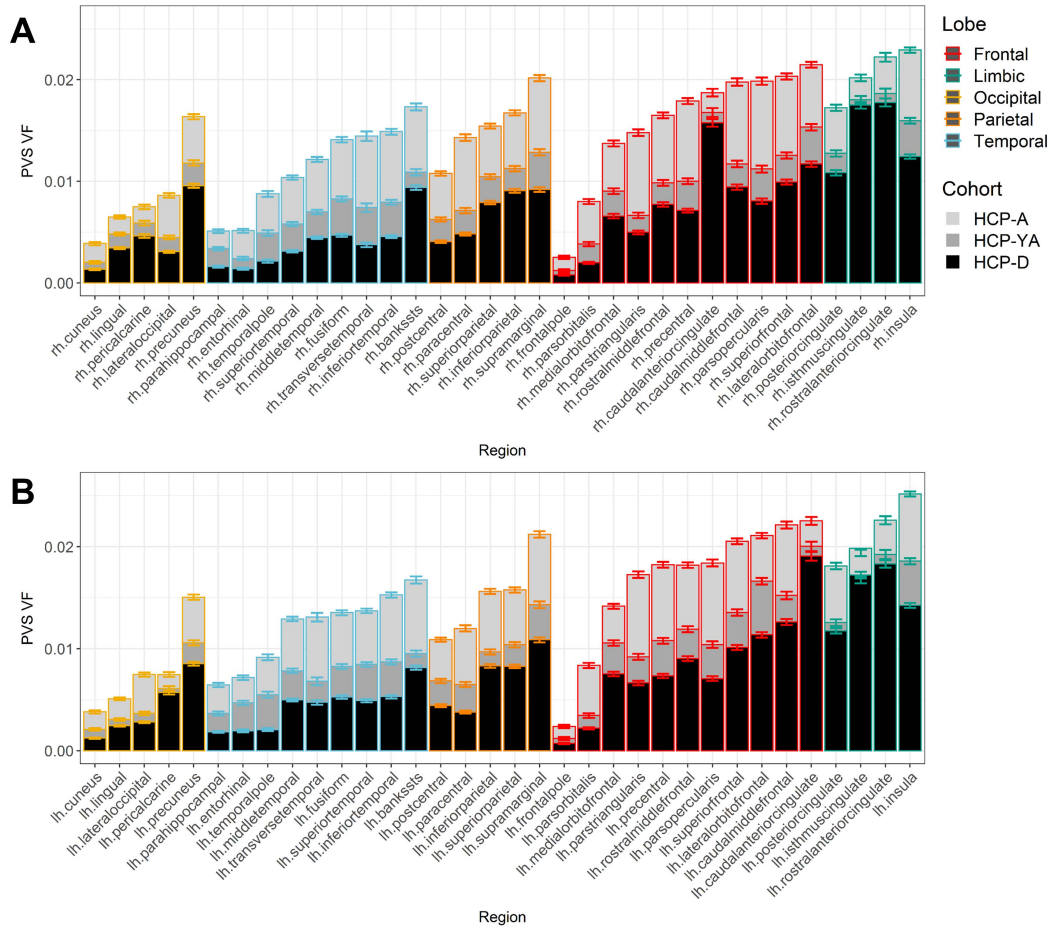

**Fig. 4.** PVS VF varies across white matter regions. The mean PVS volume fraction across white matter regions in the (A) left and (B) right hemispheres are stratified by HCP cohort and ordered according to increasing PVS VF in the HCP-A cohort within major lobes. Occipital regions have the lowest PVS VF, while limbic and frontal regions have the highest. With some exceptions, regions with low PVS burden in aging subjects also tend to be low in young adults and developing subjects, while regions with high PVS burden in aging subjects tend to also be high in young adults and developing subjects. Bars represent standard error.

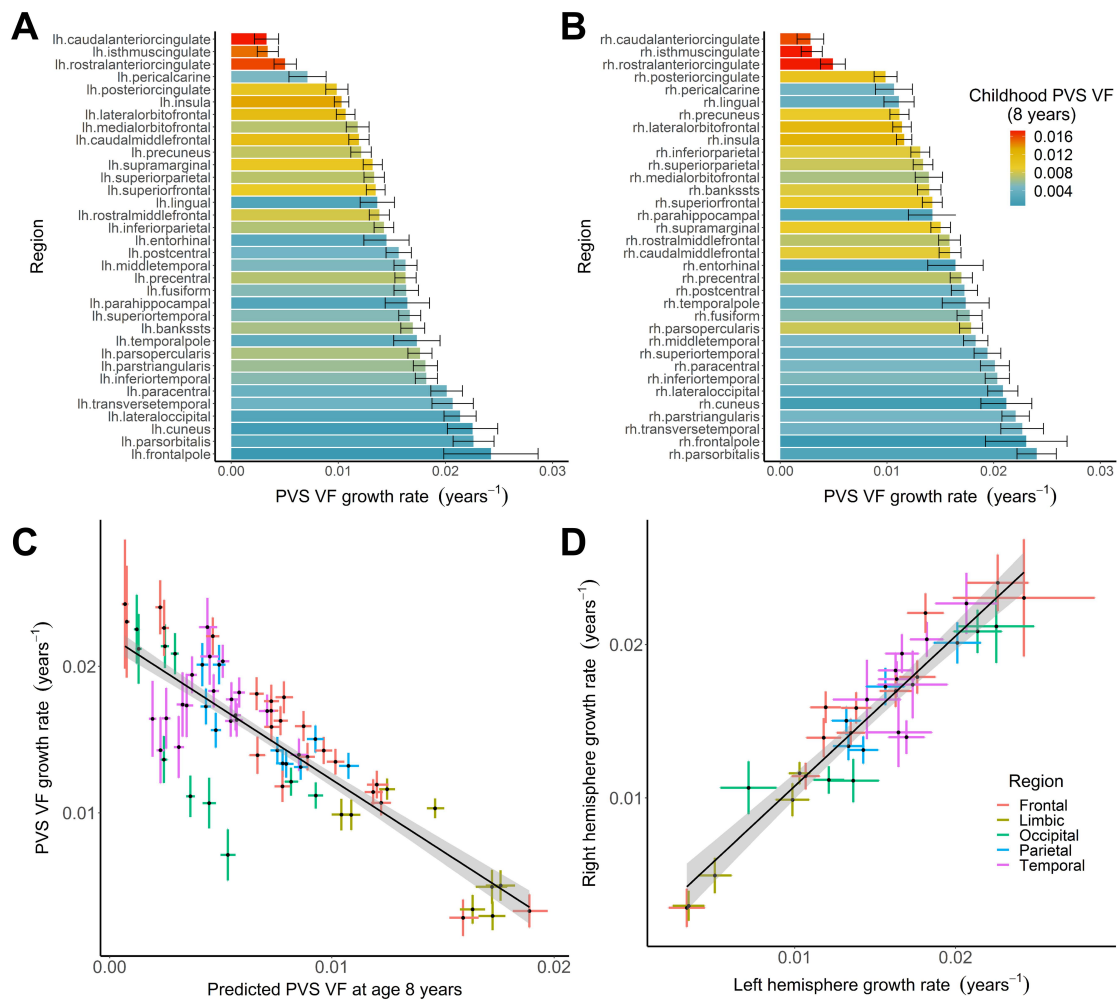

**Fig. 5.** The PVS VF growth rate across the lifespan is driven by PVS burden in childhood. Age-related changes to PVS volume fraction were fit with an exponential model to assess regional differences in PVS lifespan trajectories. Bars denoting the growth rate,  $k$ , for age-related changes to the PVS volume fraction are shown for the (A) left and (B) right white matter regions ordered from lowest to highest. The color of the bars indicate the estimated PVS VF at age 8 years. (C) The relationship between PVS VF predicted at 8 years of age (x-axis) and the PVS growth rate (y-axis) across the lifespan for bilateral white matter regions is shown. Each point reflects a single white matter region with the 95% confidence interval estimated with bootstrap resampling. PVS burden is inversely correlated with the PVS VF growth rate across the lifespan, with trends in major regional demarcations. Limbic regions with high PVS burden in childhood undergo minimal growth across the lifespan, while temporal regions have low PVS burden in childhood and undergo rapid growth across the lifespan. Occipital regions are an exception to this finding, which tend to have low PVS burden in childhood and undergo minimal growth across the lifespan. (D) The estimated growth rate for PVS VF in white matter regions are highly correlated between the left and right hemispheres.

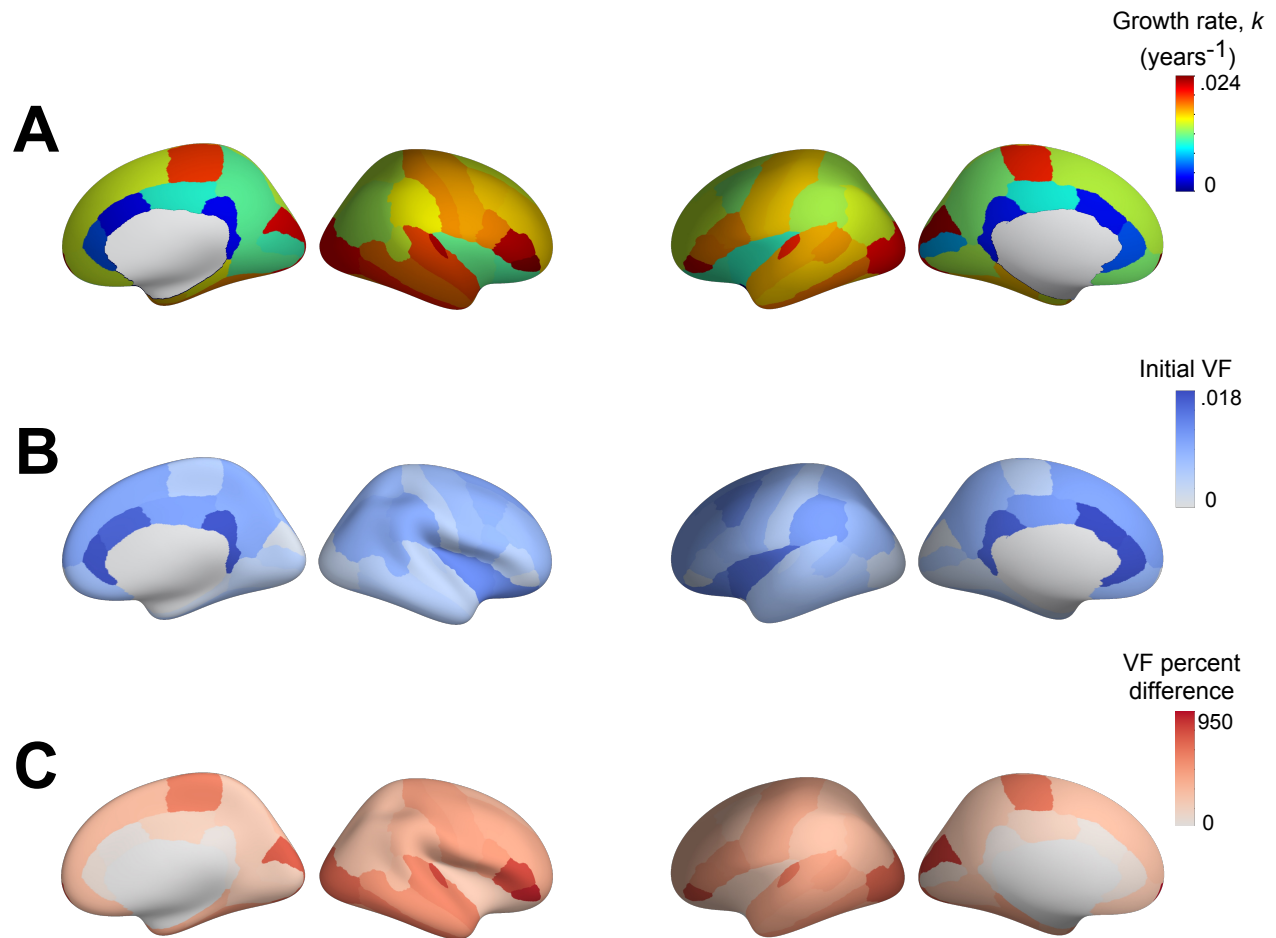

**Fig. 6.** Regional patterns of PVS VF trajectories across the lifespan. The (A) growth rate, (B) PVS VF at age 8 years and (C) percent change in PVS VF from age 8 to 89 years are shown for the 34 bilateral white matter regions projected onto the corresponding Freesurfer cortical surface label.

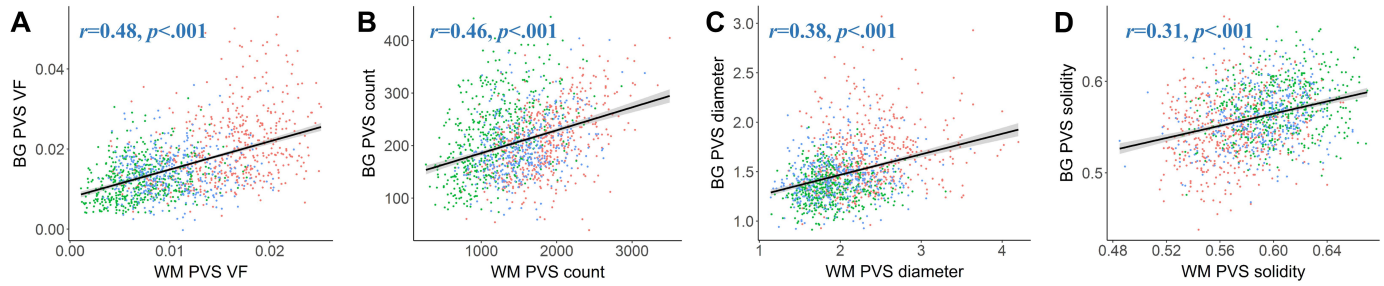

**Fig. 7.** Similar distributions of PVS morphological features are found in the BG and white matter. The relationship between PVS morphology between the white matter (x-axis) and BG (y-axis) are shown for (A) PVS VF, (B) PVS count, (C) mean PVS diameter and (D) mean PVS solidity are shown. A significant and positive relationship between PVS features in the white matter and basal ganglia were found for all PVS features, where subjects with low PVS burden in the white matter also tended to have low PVS burden in the BG, and vice versa. Each point corresponds to the measurement of a single subject and is color-coded according to the HCP cohort: green – HCP-D, blue – HCP-YA, red – HCP-A.
